# Supplementary material for: Systematic comparison of racemic and enantiopure multicomponent crystals of phenylsuccinic acid—the role of chirality
Source: Royal Society of Chemistry journal article supplement (doi:10.1039/d0ce00072h), 2020-01-01
Supplement: d0ce00072h1.pdf [file d0ce00072h1.pdf]

## Electronic Supplementary Information

---

### Systematic comparison of racemic and enantiopure multicomponent crystals of phenylsuccinic acid—the role of chirality

Jean Eudes Odounga Odounga<sup>a</sup> and Nikoletta B. Báthori<sup>\*a</sup>

<sup>a</sup> *Department of Chemistry, Cape Peninsula University of Technology, P.O. Box 652, Cape Town, 8000, South Africa.*

*Corresponding author: Nikoletta B. Báthori, E-mail: bathorin@cput.ac.za; Fax: +27 21 460 3854; Tel: +27 21 460 8354*

|                             |                                                                                                                                                                                                                                |    |
|-----------------------------|--------------------------------------------------------------------------------------------------------------------------------------------------------------------------------------------------------------------------------|----|
| <b>Experimental details</b> |                                                                                                                                                                                                                                | 3  |
| <b>Tables</b>               |                                                                                                                                                                                                                                |    |
| Table S1                    | Properties of the racemic and S-phenylsuccinic acid                                                                                                                                                                            | 5  |
| Table S2                    | Physical properties of coformers                                                                                                                                                                                               | 5  |
| Table S3                    | Crystal data for $[2\text{tBa}^+][\text{COO}^{2-}]$ , $[(\text{R/S})\text{-PSA}^-][\text{ANI}^+]$ and $[(\text{S})\text{-PSA}^{2-}] [2\text{ANI}^+]\cdot\text{ANI}$                                                            | 6  |
| Table S4                    | Hydrogen bonds in $[2\text{tBa}^+][\text{COO}^{2-}]$ , $[(\text{R/S})\text{-PSA}^-][\text{ANI}^+]$ and $[(\text{S})\text{-PSA}^{2-}] [2\text{ANI}^+]\cdot\text{ANI}$                                                           | 6  |
| Table S5                    | Crystal data for (R/S)-PSA·2PYR, (R/S)-PSA·2(4PIC) and (R/S)-PSA·2(2,4LUT)                                                                                                                                                     | 7  |
| Table S6                    | Hydrogen bonds in (R/S)-PSA·2PYR, (R/S)-PSA·2(4PIC) and (R/S)-PSA·2(2,4LUT)                                                                                                                                                    | 7  |
| Table S7                    | Crystal data for (R/S)-PSA·2(3,4LUT), 2(S)-PSA·4(3,4LUT), $[(\text{R/S})\text{-PSA}^{2-}] 2[3,5\text{LUT}^+]\cdot 2(\text{R/S})\text{-PSA}$ and $2[(\text{S})\text{-PSA}^{2-}]4[3,5\text{LUT}^+]\cdot 4(\text{S})\text{-PSA}$  | 8  |
| Table S8                    | Hydrogen bonds in (R/S)-PSA·2(3,4LUT), 2(S)-PSA·4(3,4LUT), $[(\text{R/S})\text{-PSA}^{2-}] 2[3,5\text{LUT}^+]\cdot 2(\text{R/S})\text{-PSA}$ and $2[(\text{S})\text{-PSA}^{2-}]4[3,5\text{LUT}^+]\cdot 4(\text{S})\text{-PSA}$ | 8  |
| Table S9                    | Crystal data for (R/S)-PSA·PCA                                                                                                                                                                                                 | 11 |
| Table S10                   | Hydrogen bonds in (R/S)-PSA·PCA                                                                                                                                                                                                | 11 |
| Table S11                   | Torsion angles and molecular conformations of PSA in MCCs                                                                                                                                                                      | 12 |
| Table S12                   | Thermoanalytical data for PSA MCCs                                                                                                                                                                                             | 14 |
| Table S13                   | Densities, voids, solvent percentages for PSA MCCs                                                                                                                                                                             | 15 |
| <b>Figures</b>              |                                                                                                                                                                                                                                |    |
| Figure S1                   | $[2\text{tBa}^+][\text{COO}^{2-}]$ crystal structure with labelled atoms in the ASU (a), hydrogen bonds between the ions (b) and crystal packing view down $[100]$ .                                                           | 5  |
| Figure S2                   | pKa values of PSA and coformers                                                                                                                                                                                                | 14 |
| Figure S3                   | Occurrence of carboxylic acid and pyridine moieties, and their combination in the CSD                                                                                                                                          | 15 |
| Figure S4                   | Occurrence of carboxylate and pyridinium moieties, and their combination in the CSD                                                                                                                                            | 18 |
| Figure S5                   | Occurrence of carboxylic acid and pyridine moieties, and their combination in the CSD (Organic & Inorganic)                                                                                                                    | 19 |
| Figure S6                   | Occurrence of carboxylate and pyridinium moieties, and their combination in the CSD (Organic & Inorganic)                                                                                                                      | 19 |
| Figure S7                   | DSC curve of $[2\text{tBa}^+][\text{COO}^{2-}]$ and the starting material                                                                                                                                                      | 20 |
| Figure S8                   | TG curve of $[2\text{tBa}^+][\text{COO}^{2-}]$                                                                                                                                                                                 | 20 |
| Figure S9                   | PXRD curve of $[2\text{tBa}^+][\text{COO}^{2-}]$ and the starting material                                                                                                                                                     | 21 |
| Figure S10                  | IR curve of $[2\text{tBa}^+][\text{COO}^{2-}]$ and the starting material                                                                                                                                                       | 21 |
| Figure S11                  | DSC curve of $[(\text{R/S})\text{-PSA}^-][\text{ANI}^+]$ and the starting material                                                                                                                                             | 22 |
| Figure S12                  | TG curve of $[(\text{R/S})\text{-PSA}^-][\text{ANI}^+]$                                                                                                                                                                        | 22 |
| Figure S13                  | PXRD curve of $[(\text{R/S})\text{-PSA}^-][\text{ANI}^+]$ and the starting material                                                                                                                                            | 23 |
| Figure S14                  | IR curve of $[(\text{R/S})\text{-PSA}^-][\text{ANI}^+]$ and the starting material                                                                                                                                              | 23 |
| Figure S15                  | DSC curve of $[(\text{S})\text{-PSA}^{2-}] [2\text{ANI}^+]\cdot\text{ANI}$ and the starting material                                                                                                                           | 24 |
| Figure S16                  | TG curve of $[(\text{S})\text{-PSA}^{2-}] [2\text{ANI}^+]\cdot\text{ANI}$                                                                                                                                                      | 24 |
| Figure S17                  | PXRD curve of $[(\text{S})\text{-PSA}^{2-}] [2\text{ANI}^+]\cdot\text{ANI}$ and the starting material                                                                                                                          | 25 |
| Figure S18                  | IR curve of $[(\text{S})\text{-PSA}^{2-}] [2\text{ANI}^+]\cdot\text{ANI}$ and the starting material                                                                                                                            | 25 |
| Figure S19                  | DSC curve of (R/S)-PSA·2PYR and the starting material                                                                                                                                                                          | 26 |
| Figure S20                  | TG curve of (R/S)-PSA·2PYR                                                                                                                                                                                                     | 26 |
| Figure S21                  | PXRD curve of (R/S)-PSA·2PYR and the starting material                                                                                                                                                                         | 27 |
| Figure S22                  | IR curve of (R/S)-PSA·2PYR and the starting material                                                                                                                                                                           | 27 |
| Figure S23                  | DSC curve of (R/S)-PSA·2(4PIC) and the starting material                                                                                                                                                                       | 28 |
| Figure S24                  | TG curve of (R/S)-PSA·2(4PIC)                                                                                                                                                                                                  | 28 |
| Figure S25                  | PXRD curve of (R/S)-PSA·2(4PIC) and the starting material                                                                                                                                                                      | 29 |
| Figure S26                  | IR curve of (R/S)-PSA·2(4PIC) and the starting material                                                                                                                                                                        | 29 |
| Figure S27                  | DSC curve of (R/S)-PSA·2(3,4LUT) and the starting material                                                                                                                                                                     | 30 |
| Figure S28                  | TG curve of (R/S)-PSA·2(3,4LUT)                                                                                                                                                                                                | 30 |
| Figure S29                  | PXRD curve of (R/S)-PSA·2(3,4LUT) and the starting material                                                                                                                                                                    | 31 |
| Figure S30                  | IR curve of (R/S)-PSA·2(3,4LUT) and the starting material                                                                                                                                                                      | 31 |
| Figure S31                  | DSC curve of 2(S)-PSA·4(3,4LUT) and the starting material                                                                                                                                                                      | 32 |
| Figure S32                  | TG curve of 2(S)-PSA·4(3,4LUT)                                                                                                                                                                                                 | 32 |
| Figure S33                  | PXRD curve of 2(S)-PSA·4(3,4LUT) and the starting material                                                                                                                                                                     | 33 |
| Figure S34                  | IR curve of 2(S)-PSA·4(3,4LUT) and the starting material                                                                                                                                                                       | 33 |
| Figure S35                  | DSC curve of $[(\text{R/S})\text{-PSA}^{2-}] 2[3,5\text{LUT}^+]\cdot 2(\text{R/S})\text{-PSA}$ and the starting material                                                                                                       | 34 |
| Figure S36                  | TG curve of $[(\text{R/S})\text{-PSA}^{2-}] 2[3,5\text{LUT}^+]\cdot 2(\text{R/S})\text{-PSA}$                                                                                                                                  | 34 |

|            |                                                                                                       |    |
|------------|-------------------------------------------------------------------------------------------------------|----|
| Figure S37 | PXRD curve of [(R/S)-PSA <sup>2-</sup> ] 2[3,5LUT <sup>+</sup> ].2(R/S)-PSA and the starting material | 35 |
| Figure S38 | IR curve of [(R/S)-PSA <sup>2-</sup> ] 2[3,5LUT <sup>+</sup> ].2(R/S)-PSA and the starting material   | 35 |
| Figure S39 | DSC curve of 2[(S)-PSA <sup>2-</sup> ]4[3,5LUT <sup>+</sup> ].4(S)-PSA and the starting material      | 36 |
| Figure S40 | TG curve of 2[(S)-PSA <sup>2-</sup> ]4[3,5LUT <sup>+</sup> ].4(S)-PSA                                 | 36 |
| Figure S41 | PXRD curve of 2[(S)-PSA <sup>2-</sup> ]4[3,5LUT <sup>+</sup> ].4(S)-PSA and the starting material     | 37 |
| Figure S42 | IR curve of 2[(S)-PSA <sup>2-</sup> ]4[3,5LUT <sup>+</sup> ].4(S)-PSA and the starting material       | 37 |
| Figure S43 | DSC curve of (R/S)-PSA·PCA and the starting materials                                                 | 38 |
| Figure S44 | TG curve of (R/S)-PSA·PCA                                                                             | 38 |
| Figure S45 | PXRD curve of (R/S)-PSA·PCA and the starting materials                                                | 39 |
| Figure S46 | IR curve of (R/S)-PSA·PCA and the starting materials                                                  | 39 |

## Experimental details

### Crystallisations

All materials were purchased from Sigma-Aldrich and were used without further purifications. The multicomponents crystals were synthesized by dissolving the solid acid (R/S-PSA or SPSA) in the liquid bases, while the pharmaceutical cocrystal was synthesized by dissolving the 1:1 mixture of the solid API (pyrazine carboxamide) and the solid acid (rac-PSA or S-PSA) in methanol. The mixtures were gently heated to 40-50°C on a hot plate while stirring for the solutions to be clear. After homogenisation, the solutions were allowed to cool down before filtration through a 0.45µm syringe filter into new vials and left for slow evaporation.

### Analytical methods

The thermal behaviour of the obtained crystals was recorded with a Perkin Elmer DSC 6000. Crystals taken from the mother liquor were dried with a filter paper and manually crushed. They were placed into a vented aluminium sample pan. The sample sizes were between 2–5 mg and the temperature range typically 25–350°C was at a heating rate of 10-30°C min<sup>-1</sup> depending on sample being analysed. The samples were purged with a stream of nitrogen flowing at 20 ml min<sup>-1</sup>. Calibration was done using Indium as the reference material. A supplementary DTA instrument was used to run one of the crystal samples from an external laboratory. The sample size was between 2-5 mg and the temperature range was from 30-300°C. TGA was performed on a Pyris 6 thermogravimetric analyzer. Approximately 3 mg samples were added to an alumina crucible per samples analysed. The samples were heated over a typical temperature range of 30 to 400°C at a heating rate of 10°C min<sup>-1</sup>. The samples were purged with a stream of flowing nitrogen throughout the experiment at 20 ml min<sup>-1</sup>. A supplementary TGA instrument was used to run one of the crystal samples from an external laboratory on a TA Q500 instrument from 25 to 400 °C at a heating rate of 10°C min<sup>-1</sup> with a purge gas of dry nitrogen flowing at 60 ml min<sup>-1</sup> for comparison of the percentage mass loss with the expected compound. The crystals were dried on filter paper and placed in an open crucible for thermogravimetric analysis. Fourier transform infrared spectra were collected by using a Perkin Elmer FT-IR spectrometer UATR TWO equipped with a diamond crystal, operating in the range 350 - 4000 cm<sup>-1</sup> with a resolution of 4 cm<sup>-1</sup> and four scans. A Bruker APEX II DUO X-ray diffractometer using graphite monochromated Mo K $\alpha$  ( $\lambda$  = 0.71073 Å) radiation was used for data collections. The selected crystal was cooled using an Oxford Cryostream 700 with liquid nitrogen at a flow rate of 20 ml min<sup>-1</sup>. The X-rays were produced at 50 kV and 30 mA using a Bruker K780 generator. The selected monocrystalline piece was mounted on a cryoloop and covered with Paratone N oil to retain crystallinity. The stream of nitrogen gas was set at 20 ml min<sup>-1</sup>. Cell refinement and data reduction were carried out using SAINT-Plus<sup>1</sup>. The X-ray diffraction data were scaled for absorption effects by using SADABS<sup>2</sup>. The systematic absences found in the X-ray data were studied and used to determine the point group through contrast with known space groups. The value of  $|E^2-1|$  was also inspected specifically for characteristic centrosymmetric and non-centrosymmetric point groups. The space groups were confirmed using XPREP<sup>3</sup>. The structure was solved by direct method using the SHELXT<sup>4</sup> program and

<sup>1</sup> Bruker, SAINT-Plus (including XPREP), Version 7.12, Bruker AXS Inc, Madison, Wisconsin, USA, 2004.

<sup>2</sup> Sheldrick, G. M., SADABS. University of Göttingen, Germany 1996.

<sup>3</sup> Bruker, XPREP, Version 6.14, Bruker AXS Inc, Madison, Wisconsin, USA, 2003.

<sup>4</sup> Sheldrick, G. M., SHELXT, Acta Cryst. 2015, A71, 3-8.

refined by full-matrix least-squares methods with SHELXL-2016<sup>4</sup>. XPREP was also used to prepare input files which were subsequently used in structure determination using X-Seed<sup>5</sup>. Crystal assemblies, information and other figures were generated using Mercury 3.9<sup>6</sup> software. The Bruker AXS D2 Phaser X-ray Diffractometer was used for analyses of microcrystalline material. Samples were finely ground and mounted onto a low-background sample holder. A diffractogram was acquired under ambient conditions at a power setting of 40 kV and 20 mA in reflection mode.

Hydrogen treatment: Non-hydrogen atoms were refined anisotropically and the hydrogen atoms bound to carbon atoms were placed at idealized positions and refined as riding atoms. If possible, hydroxyl hydrogen atoms were located in the difference electron density map and refined independently. In other cases, the decision about the protonation state of the COOH group was based on the analysis of the C-O bond lengths. The C-O bond lengths close to 1.3 Å were treated as C-OH groups and hydrogen atoms were added with the appropriate restraints. The length of the complementary C-O bonds that were closer to 1.2 Å were treated as C=O double bonds. If both C-O bond lengths were similar, i.e. resembled delocalisation, the group was treated as a COO<sup>-</sup>. To support the decision based on the C-O bond length, the protonation state of the nitrogen atoms of the coformers were analysed in a similar manner.

## Materials

(R/S)-Phenylsuccinic acid and (S)-Phenylsuccinic acid were used. The chemical formula, molar masses and melting points of these weak acids are listed in Table S1. Tert-butylamine (tBa), aniline (ANI), pyridine (PYR), 4-picoline (4PIC), 2,4-Lutidine (2,4LUT), 3,4-lutidine (3,4LUT), 3,5-lutidine (3,5LUT) and pyrazine carboxamide (PCA) were purchased from Sigma-Aldrich and Merck & Co. The chemical formula as well as the molecular mass, boiling and melting point of the amines and the PCA are listed in Table S2. The amines used for this research are derivatives of pyridine and differ by the position and number of the methyl groups on the phenyl ring to study effect of the position of the functional groups on the crystal packing.

## [2tBa<sup>+</sup>][COO<sup>2-</sup>]

The [2tBa<sup>+</sup>][COO<sup>2-</sup>] crystallised in the trigonal  $R\bar{3}c$  space group (No. 167) with  $\frac{1}{3}$  tBa<sup>+</sup> and  $\frac{1}{6}$  COO<sup>2-</sup> in the asymmetric unit (ASU), (ESI, Fig. S1a). Each oxygen atom hydrogen bonds to two neighbouring tBa<sup>+</sup> ions via the N3-H1...O5 interaction and its symmetry generated counterparts (Fig. S1b). The hydrophobic and ionic layers are alternating down the [001] direction (Fig. S1c).

## Bulk property analysis

In all cases the selected single crystals were representative of the bulk material. This is evident when the PXRD patterns of the bulk are compared to the respective single crystal structures (see Result of bulk property analysis for all MCCs of PSA section on page 20). Crystallisations were repeated with liquid assisted grinding and it was concluded that the grinding resulted the same compound as the solution crystallisation in all cases, with the exception of [(S)-PSA<sup>2-</sup>][2ANI<sup>+</sup>] $\cdot$ ANI (no solid material was obtained from grinding because of solubility limitations). Remaining impurity from the starting material was noted in the compound obtained by grinding when the formation of 2[(S)-PSA<sup>2-</sup>][4[3,5LUT<sup>+</sup>] $\cdot$ 4(S)-PSA was attempted.

<sup>5</sup> J. Barbour, *J. Supramol. Chem.*, 2001, 1, 189-191.

<sup>6</sup> Mercury CSD 4.2.0 - New Features for the Visualization and Investigation of Crystal Structures, C. F. Macrae, I. J. Bruno, J. A. Chisholm, P. R. Edgington, P. McCabe, E. Pidcock, L. Rodriguez-Monge, R. Taylor, J. van de Streek and P. A. Wood, *J. Appl. Cryst.*, 41, 466-470, 2008

Table S 1 Properties of the racemic and *S*-phenylsuccinic acid

| Host      | Formula                                        | Mr (g.mol <sup>-1</sup> ) | Mp (°C) |
|-----------|------------------------------------------------|---------------------------|---------|
| (R/S)-PSA | C <sub>10</sub> H <sub>10</sub> O <sub>4</sub> | 194.19                    | 165-168 |
| (S)-PSA   | C <sub>10</sub> H <sub>10</sub> O <sub>4</sub> | 194.19                    | 173-176 |

Table S 2 Physical properties of coformers

| Coformer             | Abbreviation | Formula                                        | Mr (g.mol <sup>-1</sup> ) | Bp (°C) | Mp (°C) |
|----------------------|--------------|------------------------------------------------|---------------------------|---------|---------|
| TERT-BUTYLAMINE      | tBa          | C <sub>4</sub> H <sub>11</sub> N               | 73.14                     | 44-46   | n/a     |
| ANILINE              | ANI          | C <sub>6</sub> H <sub>7</sub> N                | 93.13                     | 183-184 | n/a     |
| PYRIDINE             | PYR          | C <sub>5</sub> H <sub>5</sub> N                | 79.10                     | 115-116 | n/a     |
| 4-PICOLINE           | 4PIC         | C <sub>6</sub> H <sub>7</sub> N                | 93.13                     | 144-145 | n/a     |
| 2,4-LUTIDINE         | 2,4LUT       | C <sub>7</sub> H <sub>9</sub> N                | 107.15                    | 160-161 | n/a     |
| 3,4-LUTIDINE         | 3,4LUT       | C <sub>7</sub> H <sub>9</sub> N                | 107.15                    | 163-164 | n/a     |
| 3,5-LUTIDINE         | 3,5LUT       | C <sub>7</sub> H <sub>9</sub> N                | 107.15                    | 169-170 | n/a     |
| PYRAZINE CARBOXAMIDE | PCA          | C <sub>5</sub> H <sub>5</sub> N <sub>3</sub> O | 123.11                    | n/a     | 189     |

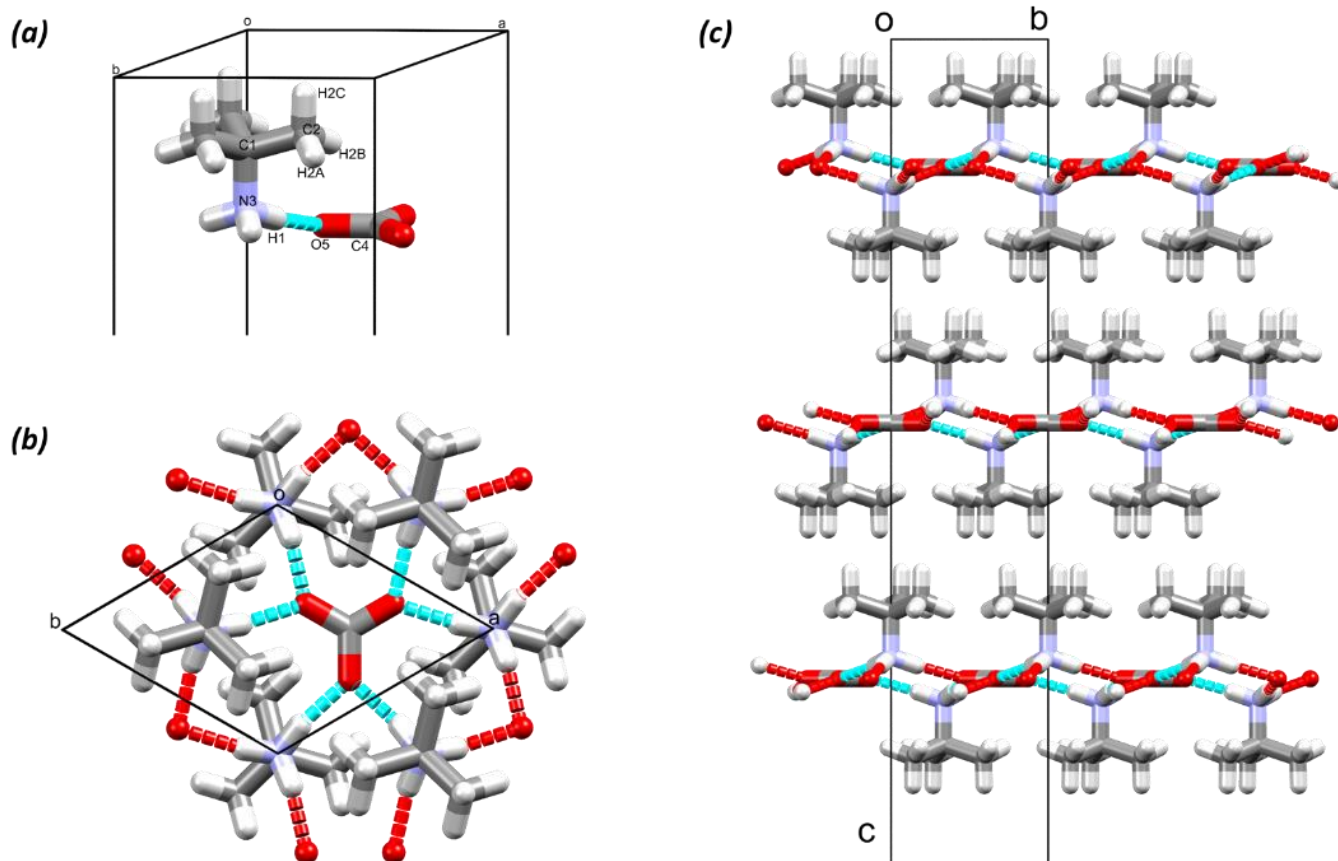

Figure S 1  $[2tBa^+][COO^{2-}]$  crystal structure with labelled atoms in the ASU (a), hydrogen bonds between the ions (b) and crystal packing view down  $[100]$ (c)

Table S 3 Crystal data for [2tBa<sup>+</sup>][COO<sup>2-</sup>], [(R/S)-PSA<sup>-</sup>][ANI<sup>+</sup>] and [(S)-PSA<sup>2-</sup>] [2ANI<sup>+</sup>]-ANI

| Crystal data                               |                                                              |                                                   |                                                               |
|--------------------------------------------|--------------------------------------------------------------|---------------------------------------------------|---------------------------------------------------------------|
| Compounds                                  | [2tBa <sup>+</sup> ][COO <sup>2-</sup> ]                     | [(R/S)-PSA <sup>-</sup> ][ANI <sup>+</sup> ]      | [(S)-PSA <sup>2-</sup> ][2ANI <sup>+</sup> ]-ANI              |
| Molecular formula                          | C <sub>9</sub> H <sub>24</sub> N <sub>2</sub> O <sub>3</sub> | C <sub>16</sub> H <sub>17</sub> NO <sub>4</sub>   | C <sub>28</sub> H <sub>31</sub> N <sub>3</sub> O <sub>4</sub> |
| Formula weight (g.mol <sup>-1</sup> )      | 208.30                                                       | 287.30                                            | 473.56                                                        |
| Crystal system                             | Trigonal                                                     | Monoclinic                                        | Orthorhombic                                                  |
| Space group                                | <i>R</i> 3c (167)                                            | <i>P</i> n(7)                                     | <i>P</i> 2 <sub>1</sub> (18)                                  |
| a (Å)                                      | 6.3212(9)                                                    | 9.5310(19)                                        | 25.731(5)                                                     |
| b (Å)                                      | 6.3212(9)                                                    | 8.3030(17)                                        | 8.2594(17)                                                    |
| c (Å)                                      | 53.448(11)                                                   | 9.885(2)                                          | 12.118(2)                                                     |
| α (°)                                      | 90                                                           | 90                                                | 90                                                            |
| β (°)                                      | 90                                                           | 111.82(3)                                         | 90                                                            |
| γ (°)                                      | 120                                                          | 90                                                | 90                                                            |
| V (Å <sup>3</sup> )                        | 1849.5(6)                                                    | 726.2(3)                                          | 2575.3(9)                                                     |
| Z                                          | 6                                                            | 2                                                 | 4                                                             |
| ρ <sub>calc</sub> /g.cm <sup>-3</sup>      | 1.122                                                        | 1.314                                             | 1.221                                                         |
| μ (MoKα) / mm <sup>-1</sup>                | 0.083                                                        | 0.095                                             | 0.082                                                         |
| F (000)                                    | 696                                                          | 304                                               | 1008                                                          |
| Crystal size (mm)                          | 0.07 × 0.38 × 0.40                                           | 0.04 × 0.240 × 0.300                              | 0.093 × 0.328 × 0.334                                         |
| Temperature (K)                            | 173(2)                                                       | 173(2)                                            | 173(2)                                                        |
| Radiation [Å]                              | MoKα (0.71073 Å)                                             | MoKα (0.71073 Å)                                  | MoKα (0.71073 Å)                                              |
| Theta min-max [°]                          | 2.286, 28.417                                                | 2.453, 28.389                                     | 1.583, 27.175                                                 |
| Dataset                                    | -8:7, -8:8, -70:70                                           | -12:12, -11:11, -13:13                            | -33:32, -10:10, -15:15                                        |
| Final R indices [I > 2.0 (I)]              | R <sub>1</sub> = 0.0331, wR <sub>2</sub> = 0.0922            | R <sub>1</sub> = 0.0392, wR <sub>2</sub> = 0.0810 | R <sub>1</sub> = 0.0415, wR <sub>2</sub> = 0.0996             |
| R indices (all data)                       | R <sub>1</sub> = 0.0359, wR <sub>2</sub> = 0.0946            | R <sub>1</sub> = 0.0500, wR <sub>2</sub> = 0.0862 | R <sub>1</sub> = 0.0473, wR <sub>2</sub> = 0.1028             |
| Tot., uniq.data, R (int)                   | 4739, 484, 0.0280                                            | 10213, 3039, 0.0316                               | 28838, 5209, 0.0375                                           |
| N <sub>ref</sub> , N <sub>par</sub>        | 528, 26                                                      | 3608, 206                                         | 5734, 394                                                     |
| S                                          | 1.118                                                        | 0.992                                             | 1.068                                                         |
| Max. ans av. Shift/error                   | 0.000, 0.000                                                 | 0.000, 0.000                                      | 0.000, 0.000                                                  |
| Min. and max. resd. Dens (Å <sup>3</sup> ) | -0.135, 0.287                                                | -0.179, 0.152                                     | -0.223, 0.177                                                 |

Table S 4 Hydrogen bonds in [2tBa<sup>+</sup>][COO<sup>2-</sup>], [(R/S)-PSA<sup>-</sup>][ANI<sup>+</sup>] and [(S)-PSA<sup>2-</sup>] [2ANI<sup>+</sup>]-ANI

| D-H...A                                           | d(D-H) (Å) | d(H...A) (Å) | d(D...A) (Å) | D-H...A (°) | Symmetry operator   |
|---------------------------------------------------|------------|--------------|--------------|-------------|---------------------|
| [2tBa <sup>+</sup> ][COO <sup>2-</sup> ]          |            |              |              |             |                     |
| N3-H1...O5                                        | 0.95       | 1.79         | 2.730        | 170.0       |                     |
| [(R/S)-PSA <sup>-</sup> ][ANI <sup>+</sup> ]      |            |              |              |             |                     |
| N15-H15A...O10                                    | 1.02       | 1.67         | 2.675        | 168.5       |                     |
| N15-H15B...O13                                    | 0.87       | 2.36         | 2.937        | 124.2       | x, y, z+1           |
| N15-H15B...O14                                    | 0.87       | 2.34         | 2.937        | 126.1       | x-1/2, -y+1, z+1/2  |
| N15-H15C...O11                                    | 0.94       | 1.77         | 2.714        | 177.4       | x+1/2, -y+1, z+1/2  |
| O14-H14...O11                                     | 0.91       | 1.61         | 2.523        | 173.5       | x+1/2, -y+1, z-1/2  |
| [(S)-PSA <sup>2-</sup> ] [2ANI <sup>+</sup> ]-ANI |            |              |              |             |                     |
| C17-H17...O13                                     | 0.95       | 2.50         | 3.265        | 138.1       |                     |
| N15-H15A...O13                                    | 0.94       | 2.51         | 3.024        | 114.5       |                     |
| N15-H15A...O14                                    | 0.94       | 1.81         | 2.721        | 163.5       |                     |
| N15-H15B...O11                                    | 0.93       | 1.85         | 2.743        | 160.4       | x, y+1, z           |
| N22-H22C...O10                                    | 0.95       | 1.79         | 2.736        | 174.0       | x, y+1, z           |
| N22-H22C...O11                                    | 0.95       | 2.55         | 3.083        | 116.0       | x, y+1, z           |
| N22-H22A...O13                                    | 0.91       | 1.78         | 2.684        | 174.4       |                     |
| N22-H22B...O10                                    | 0.95       | 1.78         | 2.723        | 175.8       | -x+1/2, y+1/2, -z   |
| N29-H29A...O11                                    | 0.87       | 2.22         | 3.089        | 175.4       |                     |
| N15-H15C...O14                                    | 0.94       | 1.77         | 2.709        | 176.0       | -x+1/2, y+1/2, -z+1 |
| C17-H17...O13                                     | 0.95       | 2.50         | 3.265        | 138.1       |                     |

Table S 5 Crystal data for (R/S)-PSA·2PYR, (R/S)-PSA·2(4PIC) and (R/S)-PSA·2(2,4LUT)

| Crystal data                                |                                                               |                                                               |                                                               |
|---------------------------------------------|---------------------------------------------------------------|---------------------------------------------------------------|---------------------------------------------------------------|
| Compounds                                   | (R/S)-PSA·2PYR                                                | (R/S)-PSA·2(4PIC)                                             | (R/S)-PSA·2(2,4LUT)                                           |
| Molecular formula                           | C <sub>20</sub> H <sub>20</sub> N <sub>2</sub> O <sub>4</sub> | C <sub>22</sub> H <sub>24</sub> N <sub>2</sub> O <sub>4</sub> | C <sub>24</sub> H <sub>28</sub> N <sub>2</sub> O <sub>4</sub> |
| Formula weight (g.mol <sup>-1</sup> )       | 352.38                                                        | 380.43                                                        | 408.48                                                        |
| Crystal system                              | Triclinic                                                     | Monoclinic                                                    | Monoclinic                                                    |
| Space group                                 | <i>P</i> $\bar{1}$ (2)                                        | <i>P</i> 2 <sub>1</sub> /c (14)                               | <i>P</i> 2 <sub>1</sub> /c (14)                               |
| a (Å)                                       | 5.6697(4)                                                     | 22.906(5)                                                     | 11.773(2)                                                     |
| b (Å)                                       | 10.5672(6)                                                    | 5.7441(11)                                                    | 8.4930(17)                                                    |
| c (Å)                                       | 15.5754(10)                                                   | 15.376(3)                                                     | 22.318(5)                                                     |
| $\alpha$ (°)                                | 109.3480(10)                                                  | 90                                                            | 90                                                            |
| $\beta$ (°)                                 | 96.6060(10)                                                   | 100.98(3)                                                     | 96.22(3)                                                      |
| $\gamma$ (°)                                | 91.6060(10)                                                   | 90                                                            | 90                                                            |
| V (Å <sup>3</sup> )                         | 872.44(10)                                                    | 1986.1(7)                                                     | 2218.4(8)                                                     |
| Z                                           | 2                                                             | 4                                                             | 4                                                             |
| $\rho_{\text{calc}}/\text{g.cm}^{-3}$       | 1.341                                                         | 1.272                                                         | 1.223                                                         |
| $\mu$ (MoK $\alpha$ ) / mm <sup>-1</sup>    | 0.094                                                         | 0.088                                                         | 0.083                                                         |
| F (000)                                     | 372                                                           | 808                                                           | 872                                                           |
| Crystal size (mm)                           | 0.010×0.010×0.010                                             | 0.080×0.110×0.210                                             | 0.180×0.380×0.570                                             |
| Temperature (K)                             | 173(2)                                                        | 173(2)                                                        | 173(2)                                                        |
| Radiation [Å]                               | MoK $\alpha$ (0.71073 Å)                                      | MoK $\alpha$ (0.71073 Å)                                      | MoK $\alpha$ (0.71073 Å)                                      |
| Theta min-max [°]                           | 1.398, 27.532                                                 | 1.811, 27.131                                                 | 1.740, 28.452                                                 |
| Dataset                                     | -7:7, -13:13, -20:20                                          | -29:29, -7:3, -19:19                                          | -15:15, -11:11, -28:29                                        |
| Final R indices [I > 2.0 (I)]               | R <sub>1</sub> =0.0359, wR <sub>2</sub> =0.0885               | R <sub>1</sub> =0.0782, wR <sub>2</sub> =0.1954               | R <sub>1</sub> =0.0545, wR <sub>2</sub> =0.1303               |
| R indices (all data)                        | R <sub>1</sub> =0.0389, wR <sub>2</sub> =0.0907               | R <sub>1</sub> =0.1345, wR <sub>2</sub> =0.2287               | R <sub>1</sub> =0.0822, wR <sub>2</sub> =0.1464               |
| Tot., uniq.data, R (int)                    | 23333, 3681, 0.0223                                           | 11159, 2529, 0.0316                                           | 25976, 3832, 0.0242                                           |
| N <sub>ref</sub> , N <sub>par</sub>         | 4011, 243                                                     | 4367, 278                                                     | 5492, 353                                                     |
| S                                           | 1.059                                                         | 1.035                                                         | 1.025                                                         |
| Max. ans av. Shift/error                    | 0.001, 0.000                                                  | 0.000, 0.000                                                  | 0.000, 0.000                                                  |
| Min. and max. resd. Dens (Å <sup>-3</sup> ) | -0.135, 0.287                                                 | -0.283, 0.473                                                 | -0.270, 0.256                                                 |

Table S 6 Hydrogen bonds in (R/S)-PSA·2PYR, (R/S)-PSA·2(4PIC) and (R/S)-PSA·2(2,4LUT)

| D-H...A             | d(D-H) (Å) | d(H...A) (Å) | d(D...A) (Å) | D-H...A (°) | Symmetry operator |
|---------------------|------------|--------------|--------------|-------------|-------------------|
| (R/S)-PSA·2PYR      |            |              |              |             |                   |
| C8-H8A...O11        | 0.99       | 2.55         | 3.356        | 138.7       | -x+2, -y+2, -z+1  |
| O11-H11...N15       | 0.95       | 1.68         | 2.625        | 174.4       |                   |
| O14-H14...N21       | 0.91       | 1.80         | 2.700        | 174.6       |                   |
| C17-H17...O10       | 0.95       | 2.53         | 3.427        | 158.6       | -x+1, -y+1, -z+1  |
| C22-H22...O13       | 0.95       | 2.66         | 3.308        | 126.1       |                   |
| (R/S)-PSA·2(4PIC)   |            |              |              |             |                   |
| C23-H23...O11B      | 0.84       | 2.43         | 2.974        | 123.5       |                   |
| O11Aa-H14A...N22    | 0.84       | 1.77         | 2.597        | 166.5       |                   |
| O14Aa-H14A...N15    | 0.84       | 1.87         | 2.704        | 177.0       |                   |
| O11Bb-H11B...N22    | 0.84       | 2.33         | 2.938        | 129.2       |                   |
| (R/S)-PSA·2(2,4LUT) |            |              |              |             |                   |
| O11-H11...N23       | 1.03       | 1.59         | 2.610        | 168.2       |                   |
| O14-H14...N15       | 1.03       | 1.56         | 2.587        | 174.2       |                   |
| C19-H19...O10       | 0.95       | 2.50         | 3.379        | 154.3       | x+1, y, z         |
| C20-H20...O13       | 0.95       | 2.64         | 3.305        | 127.6       |                   |
| C27d-H27d...O13     | 0.95       | 2.53         | 3.463        | 167.3       | x+1, y, z         |

Table S 7 Crystal data for (R/S)-PSA·2(3,4LUT), 2(S)-PSA·4(3,4LUT), [(R/S)-PSA<sup>2+</sup>] 2[3,5LUT<sup>+</sup>]-2(R/S)-PSA and 2[(S)-PSA<sup>2+</sup>]4[3,5LUT<sup>+</sup>]-4(S)-PSA

| Crystal data                               |                                                               |                                                               |                                                                  |                                                                |
|--------------------------------------------|---------------------------------------------------------------|---------------------------------------------------------------|------------------------------------------------------------------|----------------------------------------------------------------|
| Compounds                                  | (R/S)-PSA· 2(3,4LUT)                                          | 2(S)-PSA· 4(3,4LUT)                                           | [(R/S)-PSA <sup>2+</sup> ]<br>2[3,5LUT <sup>+</sup> ]-2(R/S)-PSA | 2[(S)-PSA <sup>2+</sup> ]<br>4[3,5LUT <sup>+</sup> ]-4(S)-PSA  |
| Molecular formula                          | C <sub>24</sub> H <sub>28</sub> N <sub>2</sub> O <sub>4</sub> | C <sub>28</sub> H <sub>28</sub> N <sub>2</sub> O <sub>4</sub> | C <sub>24</sub> H <sub>28</sub> N <sub>2</sub> O <sub>4</sub>    | C <sub>88</sub> H <sub>96</sub> N <sub>4</sub> O <sub>24</sub> |
| Formula weight (g.mol <sup>-1</sup> )      | 408.48                                                        | 408.48                                                        | 408.48                                                           | 1593.68                                                        |
| Crystal system                             | Triclinic                                                     | Triclinic                                                     | Monoclinic                                                       | Triclinic                                                      |
| Space group                                | <i>P</i> $\bar{1}$ (2)                                        | <i>P</i> 1 (1)                                                | <i>P</i> 2 <sub>1</sub> /c (14)                                  | <i>P</i> 1 (1)                                                 |
| a (Å)                                      | 7.0626(14)                                                    | 7.1918(14)                                                    | 12.222(2)                                                        | 8.3469(17)                                                     |
| b (Å)                                      | 8.7704(18)                                                    | 8.7570(18)                                                    | 14.926(3)                                                        | 12.268(3)                                                      |
| c (Å)                                      | 18.630(4)                                                     | 18.766(4)                                                     | 22.984(5)                                                        | 20.595(4)                                                      |
| $\alpha$ (°)                               | 90.98(3)                                                      | 89.75(3)                                                      | 90                                                               | 84.66(3)                                                       |
| $\beta$ (°)                                | 100.42(3)                                                     | 79.83(3)                                                      | 103.42(3)                                                        | 86.58(3)                                                       |
| $\gamma$ (°)                               | 107.25(3)                                                     | 72.07(3)                                                      | 90                                                               | 76.63(3)                                                       |
| V (Å <sup>3</sup> )                        | 1080.8(4)                                                     | 1105.2(4)                                                     | 4078.4(15)                                                       | 2041.2(8)                                                      |
| Z                                          | 2                                                             | 2                                                             | 4                                                                | 1                                                              |
| $\rho_{\text{calc}}/\text{g.cm}^{-3}$      | 1.255                                                         | 1.227                                                         | 1.298                                                            | 1.296                                                          |
| $\mu$ (MoK $\alpha$ ) / mm <sup>-1</sup>   | 0.086                                                         | 0.084                                                         | 0.095                                                            | 0.095                                                          |
| F (000)                                    | 436                                                           | 436                                                           | 1688                                                             | 844                                                            |
| Crystal size (mm)                          | 0.140 × 0.220 × 0.480                                         | 0.100 × 0.100 × 0.100                                         | 0.100 × 0.200 × 0.240                                            | 0.200 × 0.240 × 0.500                                          |
| Temperature (K)                            | 173(2)                                                        | 173(2)                                                        | 173(2)                                                           | 173(2)                                                         |
| Radiation [Å]                              | MoK $\alpha$ (0.71073 Å)                                      | MoK $\alpha$ (0.71073 Å)                                      | MoK $\alpha$ (0.71073 Å)                                         | MoK $\alpha$ (0.71073 Å)                                       |
| Theta min-max [°]                          | 2.229, 28.450                                                 | 4.015, 26.707                                                 | 1.640, 27.610                                                    | 1.712, 28.361                                                  |
| Dataset                                    | -9:9, -11:10, -24:24                                          | -9:9, -11:11, -23:23                                          | -14:15, -19:19, -29:29                                           | -11:11, -16:16, -27:26                                         |
| Fin. R ind. [I > 2.0 (I)]                  | R <sub>1</sub> = 0.0513, wR <sub>2</sub> = 0.1213             | R <sub>1</sub> = 0.0647, wR <sub>2</sub> = 0.1511             | R <sub>1</sub> = 0.0696, wR <sub>2</sub> = 0.1655                | R <sub>1</sub> = 0.0768, wR <sub>2</sub> = 0.1977              |
| R indices (all data)                       | R <sub>1</sub> = 0.0683, wR <sub>2</sub> = 0.1313             | R <sub>1</sub> = 0.1152, wR <sub>2</sub> = 0.1786             | R <sub>1</sub> = 0.1101, wR <sub>2</sub> = 0.1906                | R <sub>1</sub> = 0.1012, wR <sub>2</sub> = 0.2177              |
| Tot., uniq.data, R (int)                   | 12233, 4166, 0.0265                                           | 9225, 5940, 0.075                                             | 51410, 6132, 0.0506                                              | 46913, 14901, 0.0269                                           |
| N <sub>ref</sub> , N <sub>par</sub>        | 5423, 284                                                     | 9225, 546                                                     | 9432, 609                                                        | 19773, 1062                                                    |
| S                                          | 1.057                                                         | 1.023                                                         | 1.030                                                            | 1.019                                                          |
| Max. ans av. Shift/error                   | 0.000, 0.000                                                  | 0.000, 0.000                                                  | 0.000, 0.000                                                     | 0.000, 0.000                                                   |
| Min. and max. resd. Dens (Å <sup>3</sup> ) | -0.277, 0.535                                                 | -0.338, 0.428                                                 | -0.432, 0.933                                                    | -0.503, 0.725                                                  |

Table S 8 Hydrogen bonds in (R/S)-PSA·2(3,4LUT), 2(S)-PSA·4(3,4LUT), [(R/S)-PSA<sup>2+</sup>] 2[3,5LUT<sup>+</sup>]-2(R/S)-PSA and 2[(S)-PSA<sup>2+</sup>]4[3,5LUT<sup>+</sup>]-4(S)-PSA

| D-H...A             | d(D-H) (Å) | d(H...A) (Å) | d(D...A) (Å) | D-H...A (°) | Symmetry operator   |
|---------------------|------------|--------------|--------------|-------------|---------------------|
| (R/S)-PSA·2(3,4LUT) |            |              |              |             |                     |
| N15-H15...O10       | 0.92       | 2.58         | 3.192        | 123.9       |                     |
| N15-H15...O11       | 0.92       | 1.83         | 2.756        | 176.0       |                     |
| C16-H16...O10       | 0.95       | 2.50         | 3.150        | 125.3       |                     |
| C16-H16...O10Y      | 0.95       | 2.26         | 3.148        | 155.8       | x-1, y, z           |
| C20-H20...O13Y      | 0.95       | 2.35         | 3.204        | 148.7       |                     |
| N23-H23...O14       | 0.92       | 2.60         | 3.210        | 124.3       |                     |
| N23-H23...O14       | 0.92       | 1.80         | 2.722        | 179.3       |                     |
| C24-H24...O10X      | 0.95       | 2.31         | 3.143        | 146.4       | -x, y-1/2, -z+1/2   |
| C28-H28...O13       | 0.95       | 2.46         | 3.132        | 127.3       |                     |
| C28-H28...O13X      | 0.95       | 2.39         | 3.267        | 152.5       | -x+1, y-1/2, -z+1/2 |
| C1A-H1A...O14Y      | 1.00       | 2.51         | 3.342        | 153.8       |                     |



| D-H...A                                                          | d(D-H) (Å) | d(H...A) (Å) | d(D...A) (Å) | D-H...A (°) | Symmetry operator   |
|------------------------------------------------------------------|------------|--------------|--------------|-------------|---------------------|
| C8A-H8A1...O11X                                                  | 0.99       | 2.43         | 3.342        | 152.6       | -x, y-1/2, -z+1/2   |
| C1B-H1B...O11X                                                   | 1.00       | 2.34         | 3.292        | 158.5       | -x, y-1/2, -z+1/2   |
| C8B-H8B1...O14Y                                                  | 0.99       | 2.48         | 3.428        | 160.6       |                     |
| O14Y-H14Y...O11                                                  | 0.87       | 1.73         | 2.586        | 170.7       |                     |
| O14X-H14X...O13                                                  | 0.91       | 1.69         | 2.593        | 176.9       | -x+1, y+1/2, -z+1/2 |
| O11Y-H11Y...O10                                                  | 0.89       | 1.73         | 2.611        | 171.3       | x+1, y, z           |
| O11X-H11X...O14                                                  | 0.98       | 1.62         | 2.600        | 174.4       | -x, y+1/2, -z+1/2   |
| <b>2(S)-PSA·4(3,4LUT)</b>                                        |            |              |              |             |                     |
| C1A-H1A...O11X                                                   | 1.00       | 2.41         | 3.356        | 157.6       |                     |
| C8A-H8B...O11Y                                                   | 0.99       | 2.46         | 3.246        | 135.9       | x, y-1, z           |
| N15A-H15A...O13A                                                 | 0.88       | 1.82         | 2.692        | 173.3       |                     |
| N15A-H15A...O14A                                                 | 0.88       | 2.62         | 3.208        | 124.7       |                     |
| C16A-H16A...O10Y                                                 | 0.95       | 2.38         | 3.238        | 149.5       | x, y-1, z           |
| C20A-H20A...O14A                                                 | 0.95       | 2.54         | 3.180        | 125.0       |                     |
| C20A-H20A...O13Y                                                 | 0.95       | 2.38         | 3.235        | 149.4       |                     |
| N23A-H23A...O14A                                                 | 0.88       | 1.85         | 2.717        | 170.2       |                     |
| C24A-H24A...O10A                                                 | 0.95       | 2.51         | 3.168        | 126.3       |                     |
| C24A-H24A...O13X                                                 | 0.95       | 2.34         | 3.212        | 153.0       | x, y-1, z           |
| C28A-H28A...O10X                                                 | 0.95       | 2.39         | 3.232        | 147.9       |                     |
| N15B-H15B...O10X                                                 | 1.10       | 1.56         | 2.631        | 165.1       |                     |
| C16B-H16B...O10Z                                                 | 0.95       | 2.33         | 3.194        | 150.3       |                     |
| C20B-H20B...O13Z                                                 | 0.95       | 2.31         | 3.183        | 155.7       | x, y-1, z           |
| N23B-H23B...O11B                                                 | 0.76       | 1.92         | 2.667        | 171.8       |                     |
| C24B-H24B...O10W                                                 | 0.95       | 2.31         | 3.209        | 158.7       |                     |
| C28B-H28B...O13W                                                 | 0.95       | 2.22         | 3.059        | 146.5       | x, y-1, z           |
| O11W-H11W...O10B                                                 | 0.84       | 1.82         | 2.656        | 176.8       |                     |
| O14W-H14W...O11B                                                 | 0.84       | 1.82         | 2.654        | 173.6       | x, y+1, z           |
| O11X-H11X...O11A                                                 | 0.84       | 1.72         | 2.558        | 174.6       |                     |
| O14X-H11X...O10A                                                 | 0.84       | 1.78         | 2.612        | 170.1       | x, y+1, z           |
| O11Y-H11Y...O13A                                                 | 0.84       | 1.74         | 2.573        | 174.4       | x, y+1, z           |
| O14Y-H11Y...O14A                                                 | 0.84       | 1.73         | 2.566        | 174.0       |                     |
| O11Z-H11Z...O13B                                                 | 0.84       | 1.79         | 2.611        | 165.5       |                     |
| O14Z-H14Z...O14B                                                 | 0.84       | 1.88         | 2.709        | 170.2       | x, y+1, z           |
| <b>[(R/S)-PSA<sup>2-</sup>] 2[3,5LUT<sup>+</sup>]·2(R/S)-PSA</b> |            |              |              |             |                     |
| N15-H15...O10                                                    | 0.92       | 2.58         | 3.192        | 123.9       |                     |
| N15-H15...O11                                                    | 0.92       | 1.83         | 2.756        | 176.0       |                     |
| C16-H16...O10                                                    | 0.95       | 2.50         | 3.150        | 125.3       |                     |
| C16-H16...O10Y                                                   | 0.95       | 2.26         | 3.148        | 155.8       | x-1, y, z           |
| C20-H20...O13Y                                                   | 0.95       | 2.35         | 3.204        | 148.7       |                     |
| N23-H23...O13                                                    | 0.92       | 2.60         | 3.210        | 124.3       |                     |
| N23-H23...O14                                                    | 0.92       | 1.80         | 2.722        | 179.3       |                     |
| C24-H24...O10X                                                   | 0.95       | 2.31         | 3.143        | 146.4       |                     |
| C28-H28...O13                                                    | 0.95       | 2.46         | 3.132        | 127.3       |                     |
| C28-H28...O13X                                                   | 0.95       | 2.39         | 3.267        | 152.5       | x+1, y, z           |
| C1A-H1A...O14Y                                                   | 1.00       | 2.51         | 3.342        | 153.8       |                     |
| C8A-H8A1...O11X                                                  | 0.99       | 2.43         | 3.342        | 152.6       |                     |
| C1B-H1B...O11X                                                   | 1.00       | 2.34         | 3.292        | 158.5       |                     |
| C8B-H8B...O14Y                                                   | 0.99       | 2.48         | 3.428        | 160.6       |                     |
| O14Y-H14Y...O11                                                  | 0.87       | 1.73         | 2.586        | 170.7       |                     |
| O14X-H14X...O13                                                  | 0.91       | 1.69         | 2.593        | 176.9       | x-1, y, z           |
| O11Y-H11Y...O10                                                  | 0.89       | 1.73         | 2.611        | 171.3       | x+1, y, z           |
| O11X-H11X...O14                                                  | 0.98       | 1.62         | 2.600        | 174.4       |                     |

| D-H...A                                                      | d(D-H) (Å) | d(H...A) (Å) | d(D...A) (Å) | D-H...A (°) | Symmetry operator |
|--------------------------------------------------------------|------------|--------------|--------------|-------------|-------------------|
| <b>2[(S)-PSA<sup>2-</sup>]4[3,5LUT<sup>+</sup>]·4(S)-PSA</b> |            |              |              |             |                   |
| C1A-H1A...O11X                                               | 1.00       | 2.41         | 3.356        | 157.6       | x, y+1, z         |
| C8A-H8B...O11Y                                               | 0.99       | 2.46         | 3.246        | 135.9       | x, y-1, z         |
| N15A-H15A...O13A                                             | 0.88       | 1.82         | 2.692        | 173.3       |                   |
| N15A-H15A...O14A                                             | 0.88       | 2.62         | 3.208        | 124.7       |                   |
| C16A-H16A...O10Y                                             | 0.95       | 2.38         | 3.238        | 149.5       | x, y-1, z         |
| C20A-H20A...O14A                                             | 0.95       | 2.54         | 3.180        | 125.0       |                   |
| C20A-H20A...O13Y                                             | 0.95       | 2.38         | 3.235        | 149.4       |                   |
| N23A-H23A...O11A                                             | 0.88       | 1.85         | 2.717        | 170.2       |                   |
| C24A-H24A...O10A                                             | 0.95       | 2.51         | 3.168        | 126.3       |                   |
| C24A-H24A...O13X                                             | 0.95       | 2.34         | 3.212        | 153.0       |                   |
| C28A-H28A...O10X                                             | 0.95       | 2.39         | 3.231        | 147.9       | x, y+1, z         |
| N15B-H15B...O13B                                             | 1.10       | 1.56         | 2.631        | 165.1       |                   |
| C16B-H16B...O10Z                                             | 0.95       | 2.33         | 3.194        | 150.3       | x, y+1, z         |
| C20B-H20B...O13Z                                             | 0.95       | 2.31         | 3.183        | 155.7       |                   |
| N23B-H23B...O11B                                             | 0.76       | 1.92         | 2.667        | 171.8       |                   |
| C24B-H24B...O10W                                             | 0.95       | 2.31         | 3.209        | 158.7       |                   |
| C28B-H28B...O13W                                             | 0.95       | 2.22         | 3.059        | 146.5       | x, y-1, z         |
| O11W-H11W...O10B                                             | 0.84       | 1.82         | 2.656        | 176.8       |                   |
| O14W-H14W...O11B                                             | 0.84       | 1.82         | 2.654        | 173.6       | x, y+1, z         |
| O11X-H11X...O11A                                             | 0.84       | 1.72         | 2.558        | 174.6       | x, y-1, z         |
| O14X-H11X...O10A                                             | 0.84       | 1.78         | 2.612        | 170.1       |                   |
| O11Y-H11Y...O13A                                             | 0.84       | 1.74         | 2.573        | 174.4       | x, y+1, z         |
| O14Y-H11Y...O14A                                             | 0.84       | 1.73         | 2.566        | 174.0       |                   |
| O11Z-H11Z...O13B                                             | 0.84       | 1.79         | 2.611        | 165.5       | x, y-1, z         |
| O14Z-H14Z...O14B                                             | 0.84       | 1.88         | 2.709        | 170.2       |                   |

Table S 9 Crystal data for (R/S)-PSA•PCA

| Crystal data                                |                                                               |
|---------------------------------------------|---------------------------------------------------------------|
| Compounds                                   | (R/S)-PSA•PCA                                                 |
| Molecular formula                           | C <sub>15</sub> H <sub>15</sub> N <sub>3</sub> O <sub>5</sub> |
| Formula weight (g.mol <sup>-1</sup> )       | 317.30                                                        |
| Crystal system                              | Triclinic                                                     |
| Space group                                 | <i>P</i> $\bar{1}$ (2)                                        |
| a (Å)                                       | 5.7726(12)                                                    |
| b (Å)                                       | 7.9815(16)                                                    |
| c (Å)                                       | 16.594(3)                                                     |
| $\alpha$ (°)                                | 99.36(3)                                                      |
| $\beta$ (°)                                 | 99.28(3)                                                      |
| $\gamma$ (°)                                | 97.44(3)                                                      |
| V (Å <sup>3</sup> )                         | 734.9(3)                                                      |
| Z                                           | 2                                                             |
| $\rho_{\text{calc}}$ / g.cm <sup>-3</sup>   | 1.434                                                         |
| $\mu$ (MoK $\alpha$ ) / mm <sup>-1</sup>    | 0.110                                                         |
| F (000)                                     | 332                                                           |
| Crystal size (mm)                           | 0.040 × 0.220 × 0.900                                         |
| Temperature (K)                             | 173(2)                                                        |
| Radiation [Å]                               | MoK $\alpha$ (0.71073 Å)                                      |
| Theta min-max [°]                           | 1.266, 28.353                                                 |
| Dataset                                     | -7:7, -10:10, -22:22                                          |
| Final R indices [I > 2.0 (I)]               | R <sub>1</sub> = 0.0403, wR <sub>2</sub> = 0.0898             |
| R indices (all data)                        | R <sub>1</sub> = 0.0553, wR <sub>2</sub> = 0.0971             |
| Tot., uniq.data, R (int)                    | 19165, 2858, 0.0416                                           |
| N <sub>ref</sub> , N <sub>par</sub>         | 3666, 224                                                     |
| S                                           | 1.040                                                         |
| Max. ans av. Shift/error                    | 0.001, 0.000                                                  |
| Min. and max. resd. Dens (Å <sup>-3</sup> ) | -0.210, 0.274                                                 |

Table S 10 Hydrogen bonds in (R/S)-PSA•PCA

| D-H...A        | d(D-H) (Å) | d(H...A) (Å) | d(D...A) (Å) | D-H...A (°) | Symmetry operator |
|----------------|------------|--------------|--------------|-------------|-------------------|
| N17-H17A...O13 | 0.89       | 2.08         | 2.949        | 163.8       |                   |
| O14-H14...O15  | 0.93       | 1.70         | 2.619        | 168.3       |                   |
| O11-H11...O10  | 0.91       | 1.74         | 2.653        | 176.0       | -x+1, -y+2, -z+1  |
| C20-H20...N22  | 0.95       | 2.57         | 3.418        | 149.4       | x+1, y, z         |
| C23-H23...N19  | 0.95       | 2.57         | 3.419        | 148.8       | x-1, y, z         |

Table S 11 Torsion angles and molecular conformations of PSA in MCCs

| Crystal                                    | $\tau_1(^{\circ})$ | $\tau_2(^{\circ})$ | $\tau_3(^{\circ})$ | Conformation                                                                          |
|--------------------------------------------|--------------------|--------------------|--------------------|---------------------------------------------------------------------------------------|
| [(R/S)-PSA $\cdot$ ][ANI $^+$ ]            | -64.15             | 81.82              | -130.86            | 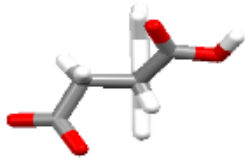   |
| [(S)-PSA $^{2-}$ ][2ANI $^+$ ] $\cdot$ ANI | -105.83            | 56.68              | -160.12            |    |
| (R/S)-PSA $\cdot$ 2PYR                     | -85.26             | 176.14             | -6.65              |    |
| (R/S)-PSA $\cdot$ 2(4PIC)                  | -98.46             | 65.87              | -159.22            |   |
| (R/S)-PSA $\cdot$ 2(2,4LUT)                | -93.00             | 111.36             | -11.73             |  |
| (R/S)-PSA $\cdot$ 2(3,4LUT)                | -73.40             | 169.02             | -6.36              |  |
| 2(S-PSA) $\cdot$ 4(3,4LUT)                 | -113.11            | 165.80             | -59.68             |  |
|                                            | -75.46             | 171.77             | -10.97             |  |

Table S 11 Torsion angles and molecular conformations of PSA in MCCs (cont.)

| Crystal                                                                                 | $\tau_1(^{\circ})$ | $\tau_2(^{\circ})$ | $\tau_3(^{\circ})$ | Conformation                                                                          |
|-----------------------------------------------------------------------------------------|--------------------|--------------------|--------------------|---------------------------------------------------------------------------------------|
| [(R/S)-PSA <sup>2-</sup> ] <sub>2</sub> [3,5LUT <sup>+</sup> ] <sub>2</sub> ·2(R/S)-PSA | -99.27             | -49.03             | -42.52             | 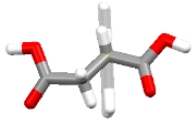   |
|                                                                                         | -93.93             | 60.12              | -138.99            |    |
|                                                                                         | -71.72             | -70.57             | -31.28             |    |
| 2[(S)-PSA <sup>2-</sup> ] <sub>4</sub> [3,5LUT <sup>+</sup> ] <sub>4</sub> ·4 (S)-PSA   | -78.14             | 70.06              | -140.60            |    |
|                                                                                         | -117.66            | 76.08              | 164.75             |   |
|                                                                                         | -71.37             | 46.24              | -130.48            |  |
|                                                                                         | -175.88            | 47.43              | -117.61            |  |
|                                                                                         | -76.84             | 61.30              | -140.35            |  |
|                                                                                         | -127.54            | 64.23              | 154.65             |  |
| (R/S)-PSA·PCA                                                                           | -74.06             | 173.47             | -18.10             |  |

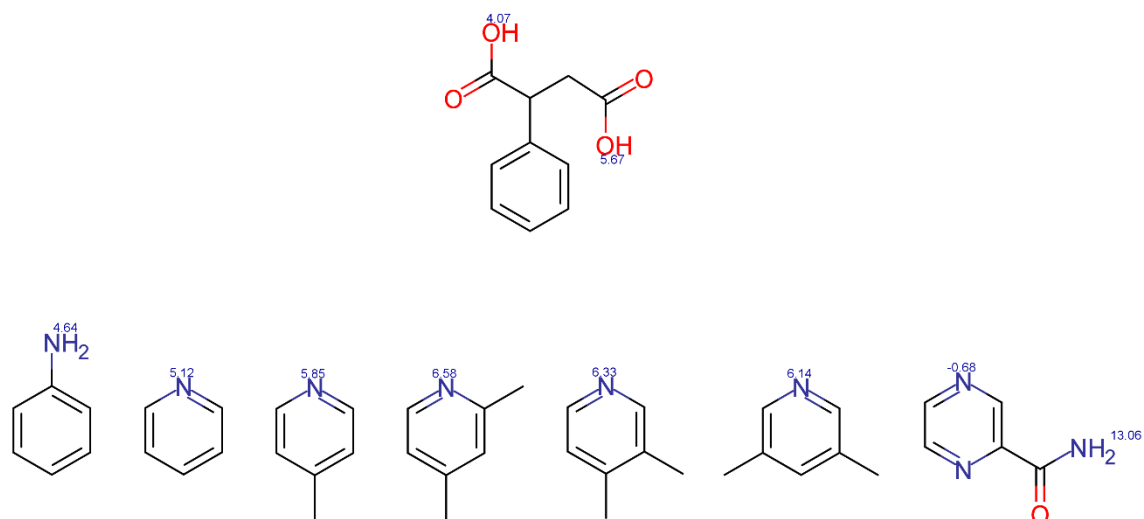

Figure S 2  $pK_a$  values of PSA and coformers

Table S 12 Thermoanalytical data for PSA MCCs

| Acid      | Coformer | TGA             |               |              |           |     | DSC           |         |                |               |
|-----------|----------|-----------------|---------------|--------------|-----------|-----|---------------|---------|----------------|---------------|
|           |          | % DECOMPOSITION |               |              |           |     | MELTING POINT |         |                |               |
|           |          | Measured %      | Theoretical % | Difference % | H:G ratio |     | Onset °C      | Peak °C | $\Delta H$ J/g | $\Delta T$ °C |
| (R/S)-PSA | -        | n/a             | n/a           | n/a          | n/a       | n/a | 170.15        | 171.97  | 146.37         | n/a           |
| (S)-PSA   | -        | n/a             | n/a           | n/a          | n/a       | n/a | 172.05        | 177.54  | 140.15         | n/a           |
| PCA       | -        | n/a             | n/a           | n/a          | n/a       | n/a | 189.09        | 191.34  | 194.54         | n/a           |
| (R/S)-PSA | ANI      | 30.84           | 32.41         | -1.57        | 1:1       | 1:1 | 135.28        | 137.79  | 135.66         | 34.87         |
| (S)-PSA   | ANI      | 48.01           | 59.00         | -10.99       | 1:2.4     | 1:3 | 61.00         | 63.55   | 108.30         | 111.05        |
| (R/S)-PSA | PYR      | 34.01           | 44.89         | -10.88       | 1:1.5     | 1:2 | 62.17         | 70.07   | 97.13          | 107.98        |
| (R/S)-PSA | 4PIC     | 20.95           | 48.96         | -28.01       | 1:0.9     | 1:2 | 65.72         | 69.76   | 92.76          | 106.33        |
| (R/S)-PSA | 3,4LUT   | 30.61           | 59.07         | -28.46       | 1:1       | 1:2 | 84.99         | 88.32   | 146.95         | 50.29         |
| (S)-PSA   | 3,4LUT   | 36.08           | 68.82         | -32.74       | 2:2.1     | 2:4 | 55.46         | 63.46   | 80.25          | 116.59        |
| (R/S)-PSA | 3,5LUT   | 97.32           | 62.34         | n/a          | n/a       | 3:2 | 134.76        | 138.78  | 110.21         | 35.39         |
| (S)-PSA   | 3,5LUT   | 95.51           | 76.80         | n/a          | n/a       | 6:4 | 97.12         | 103.19  | 71.79          | 74.93         |
| (R/S)-PSA | PCA      | 97.21           | 55.91         | n/a          | n/a       | 1:2 | 125.27        | 130.21  | 109.97         | 44.88         |

\*Thermoanalytical results for (R/S)-PSA·2,4LUT were not performed due to scarcity of sample.

\* $\Delta T = T_{\text{onset, acid}} - T_{\text{onset, MCC}}$

Table S 13 Densities, voids, solvent percentages for PSA MCCs

| Crystal                                                                              | Density                  | %Base | H:G ratio | Type        |
|--------------------------------------------------------------------------------------|--------------------------|-------|-----------|-------------|
| <b>[(R/S)-PSA<sup>-</sup>][ANI<sup>+</sup>]</b>                                      | 1.314 g.cm <sup>-3</sup> | 36.5% | 1:1       | Tubulate    |
| 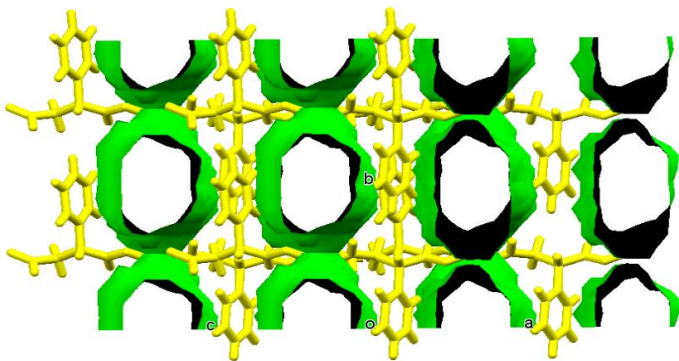   |                          |       |           |             |
| <b>[(S)-PSA<sup>2-</sup>][2ANI<sup>+</sup>·ANI]</b>                                  | 1.221 g.cm <sup>-3</sup> | 63.3% | 1:3       | Tubulate    |
|   |                          |       |           |             |
| <b>(R/S)-PSA·2PYR</b>                                                                | 1.341 g.cm <sup>-3</sup> | 44.6% | 1:2       | Intercalate |
|  |                          |       |           |             |

Table S 14 Densities, voids, solvent percentages for PSA MCCs (cont.)

| Crystal                                                                              | Density                  | %Base | H:G ratio | Type        |
|--------------------------------------------------------------------------------------|--------------------------|-------|-----------|-------------|
| (R/S)-PSA·2(4PIC)                                                                    | 1.272 g.cm <sup>-3</sup> | 55.4% | 1:2       | Intercalate |
| 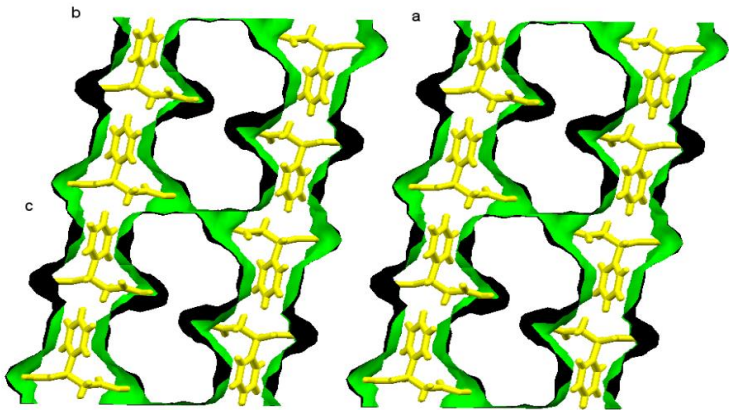   |                          |       |           |             |
| (R/S)-PSA·2(2,4LUT)                                                                  | 1.223 g.cm <sup>-3</sup> | 54.6% | 1:2       | Intercalate |
|  |                          |       |           |             |
| (R/S)-PSA·2(3,4LUT)                                                                  | 1.255 g.cm <sup>-3</sup> | 59.1% | 1:2       | Intercalate |
|  |                          |       |           |             |



Table S 15 Densities, voids, solvent percentages for PSA MCCs (cont.)

| Crystal                                                                              | Density                  | %Base | H:G ratio | Type        |
|--------------------------------------------------------------------------------------|--------------------------|-------|-----------|-------------|
| <b>2(S)-PSA·4(3,4LUT)</b>                                                            | 1.227 g.cm <sup>-3</sup> | 58.1% | 2:4       | Intercalate |
| 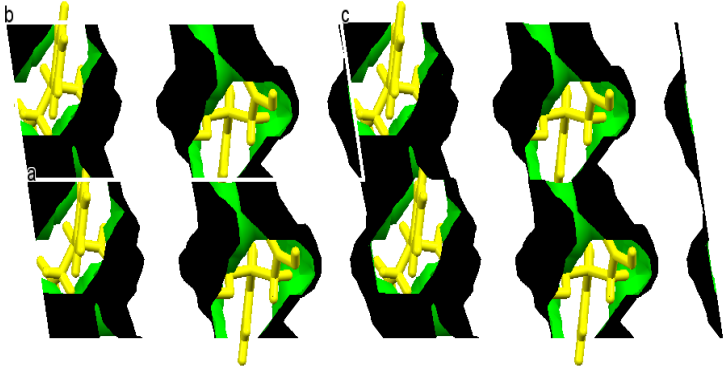   |                          |       |           |             |
| <b>[(R/S)-PSA<sup>2+</sup>]<br/>2[3,5LUT<sup>+</sup>]·2(R/S)-PSA</b>                 | 1.298 g.cm <sup>-3</sup> | 33.5% | 2:3       | Tubulate    |
|  |                          |       |           |             |
| <b>2[(S)-PSA<sup>2+</sup>]<br/>4[3,5LUT<sup>+</sup>]·4(S)-PSA</b>                    | 1.296 g.cm <sup>-3</sup> | 28.8% | 4:6       | Tubulate    |
|  |                          |       |           |             |

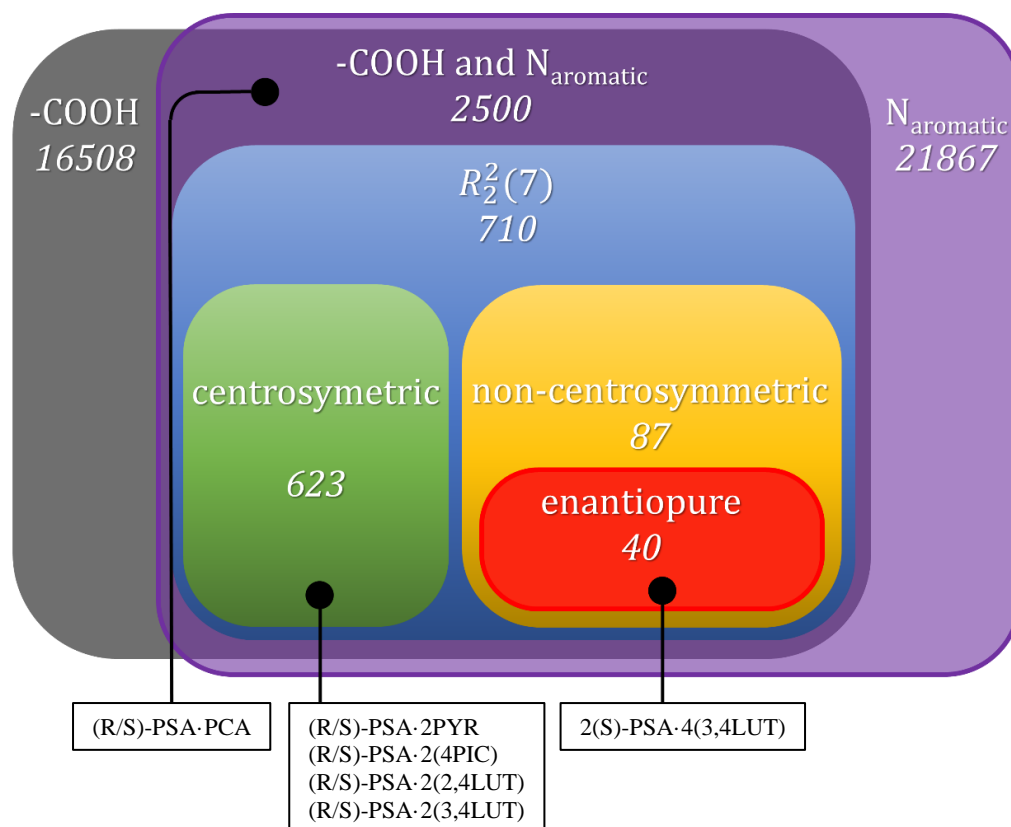

Figure S 3 Occurrence of carboxylic acid and pyridine moieties, and their combination in the CSD

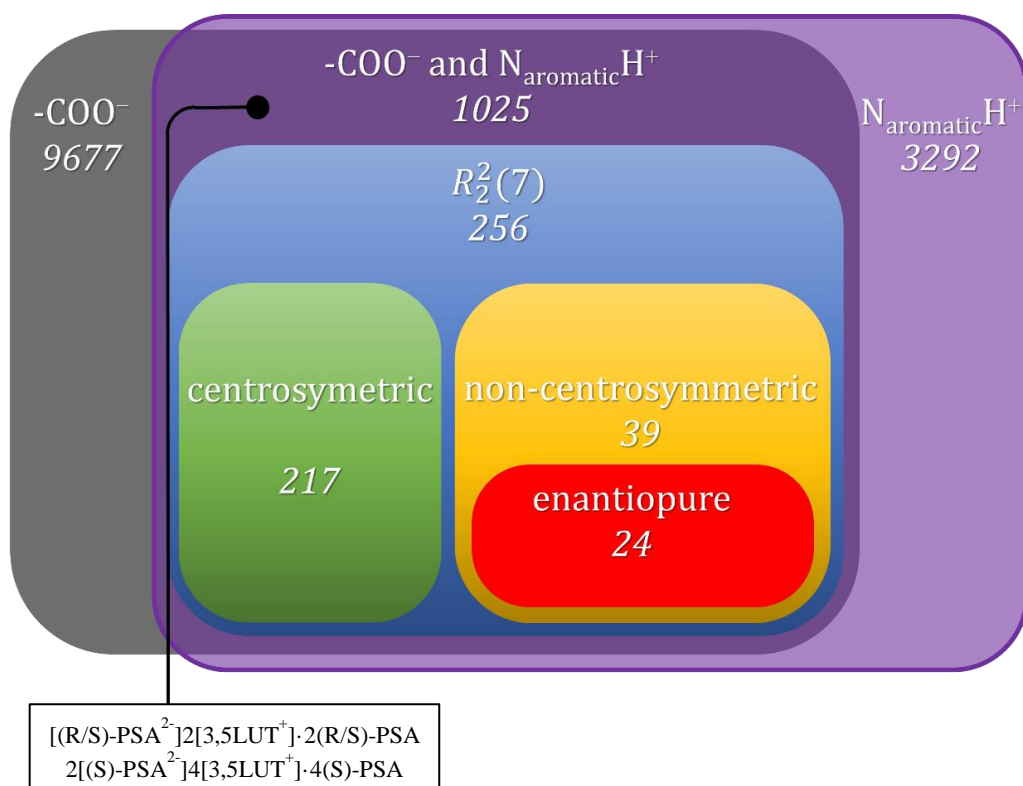

Figure S 4 Occurrence of carboxylate and pyridinium moieties, and their combination in the CSD

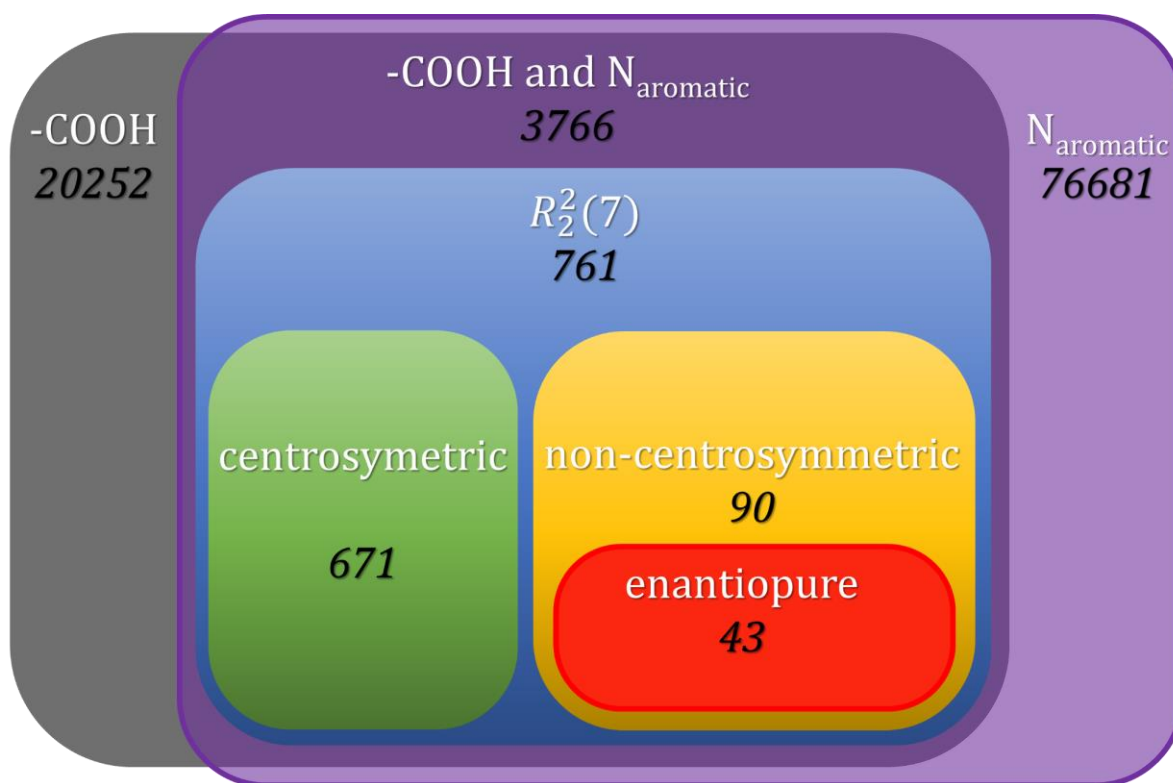

Figure S 5 Occurrence of carboxylic acid and pyridine moieties, and their combination in the CSD (Organic & Inorganic)

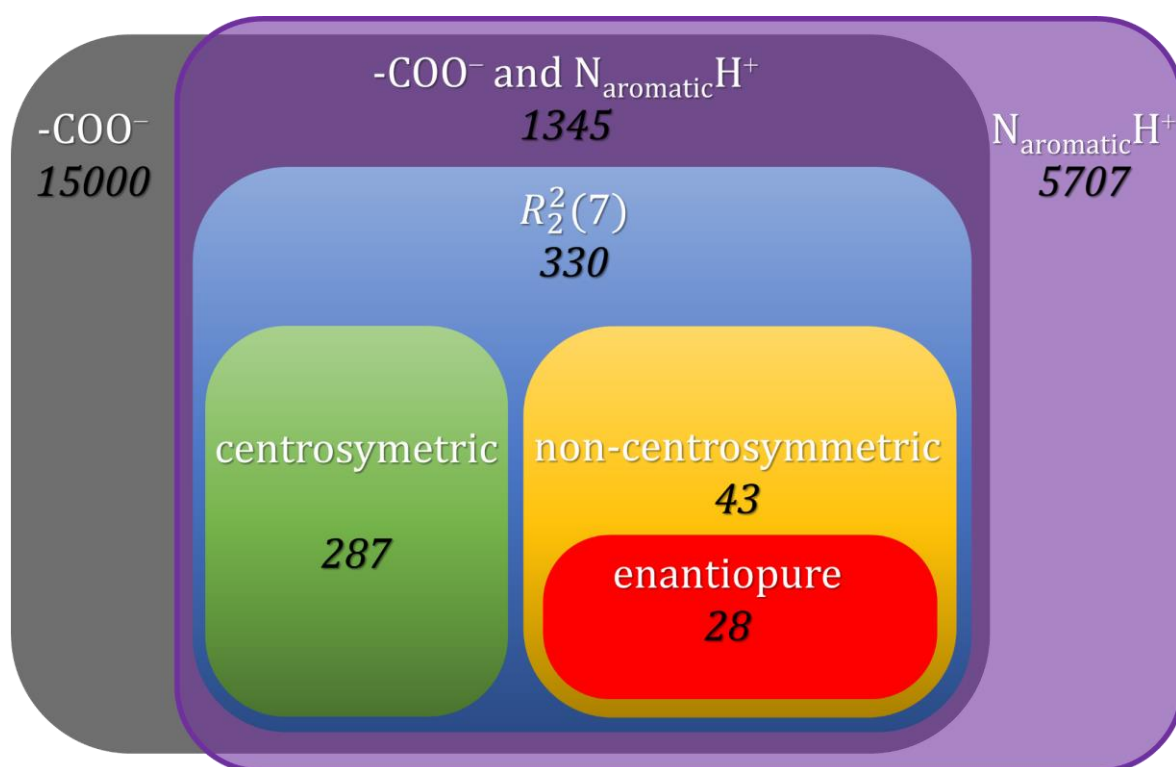

Figure S 6 Occurrence of carboxylate and pyridinium moieties, and their combination in the CSD (Organic & Inorganic)

## Results of bulk property analysis (DSC, TGA, PXRD and FTIR) for all MCCs of PSA

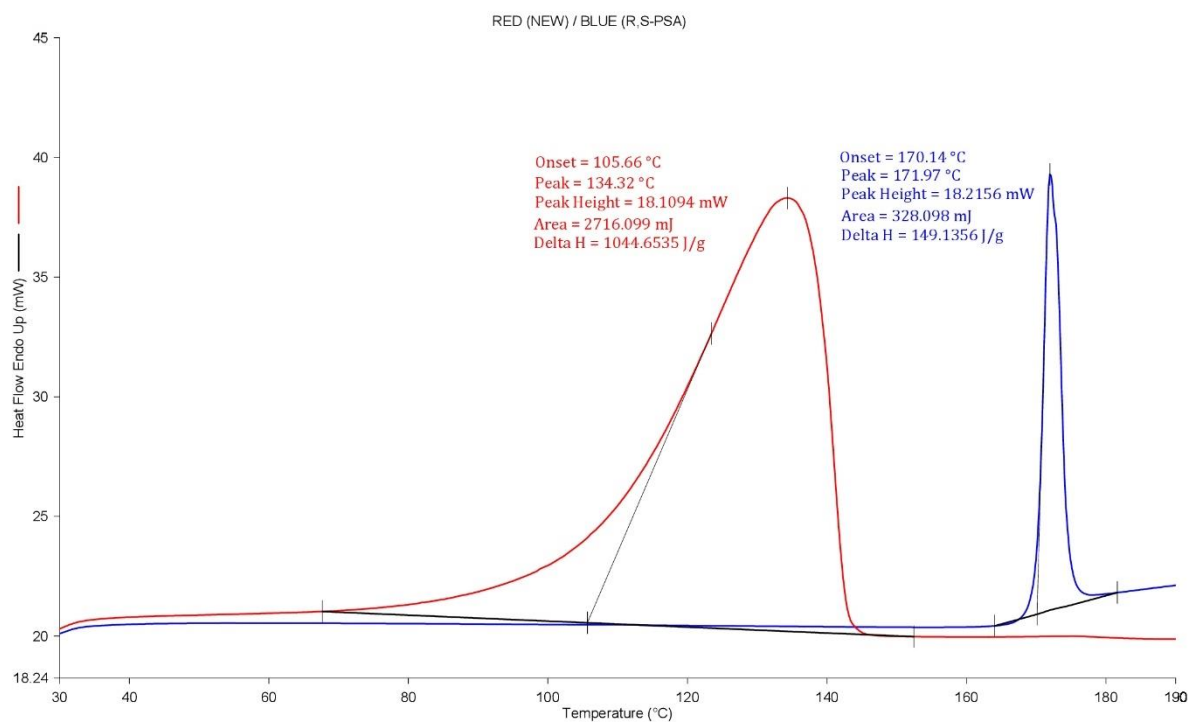

**Figure S7** DSC curve of  $[2\text{tBa}^+][\text{COO}^{2-}]$  and the starting material

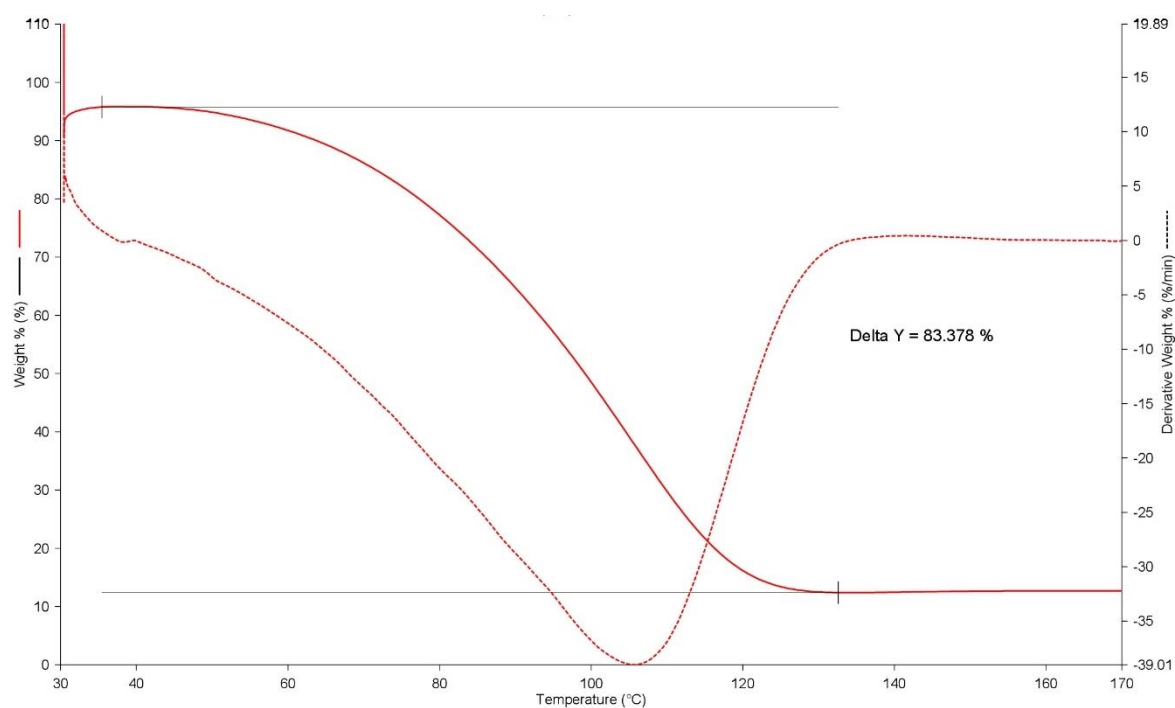

**Figure S8** TG curve of  $[2\text{tBa}^+][\text{COO}^{2-}]$

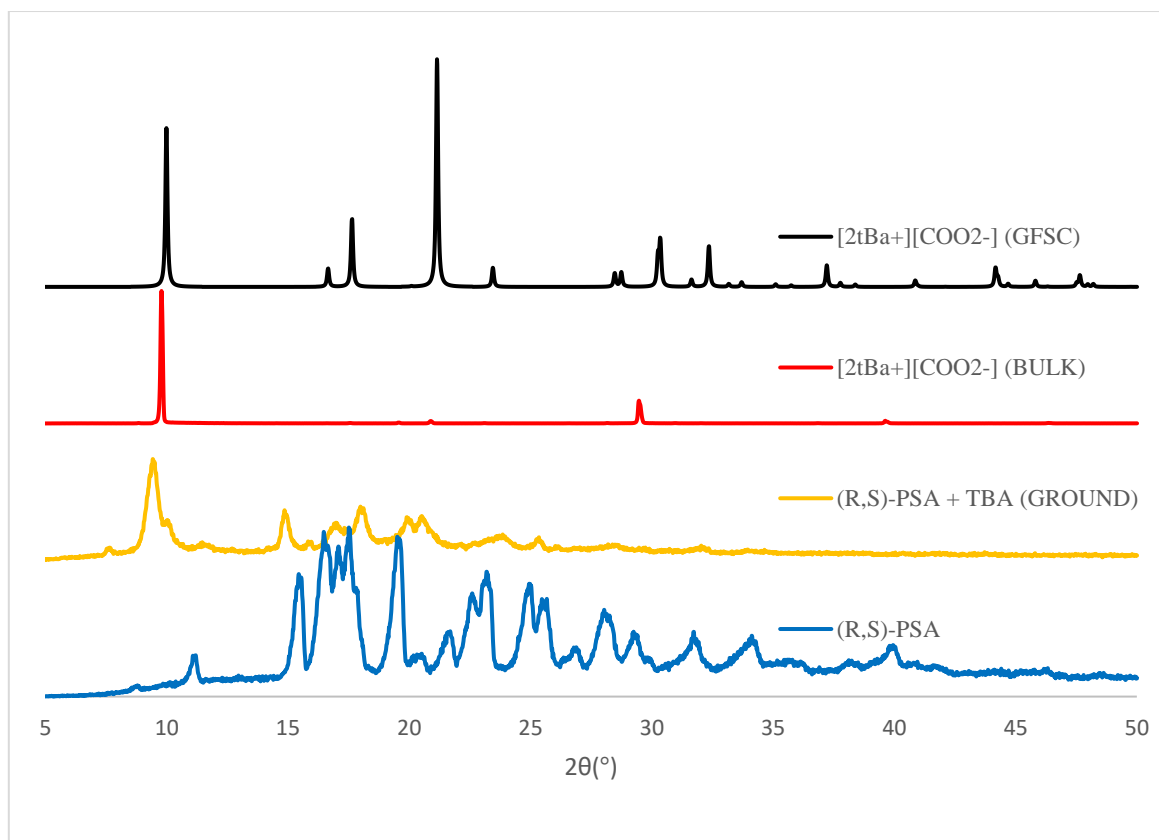

**Figure S9** PXRD curve of [2tBa<sup>+</sup>][COO<sup>2-</sup>] and the starting material

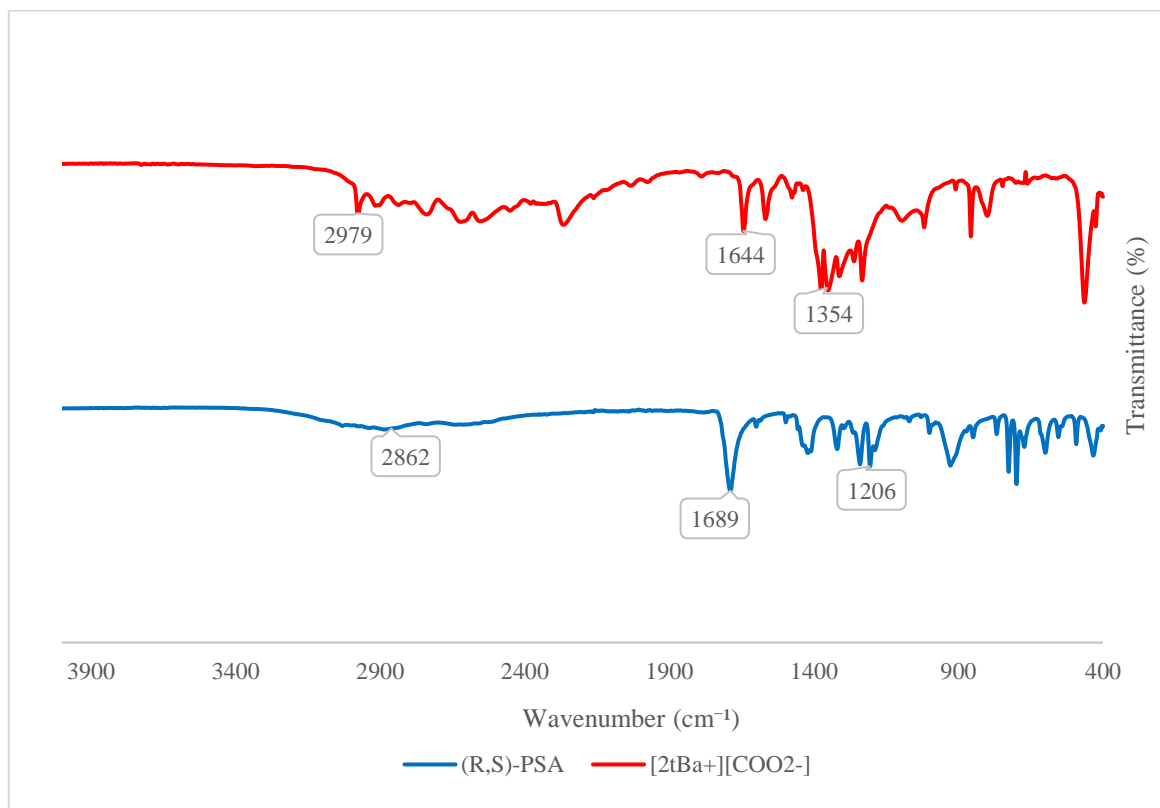

**Figure S10** IR curve of [2tBa<sup>+</sup>][COO<sup>2-</sup>] and the starting material

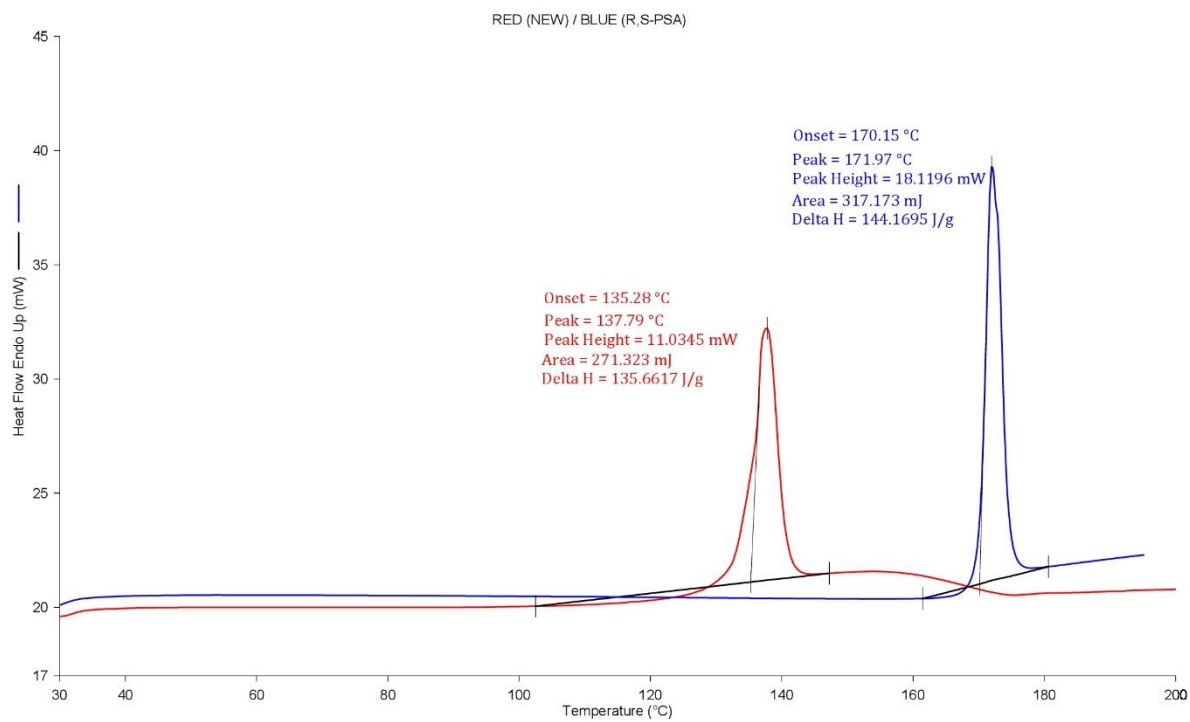

**Figure S11** DSC curve of [(R/S)-PSA<sup>-</sup>][ANI<sup>+</sup>] and the starting material

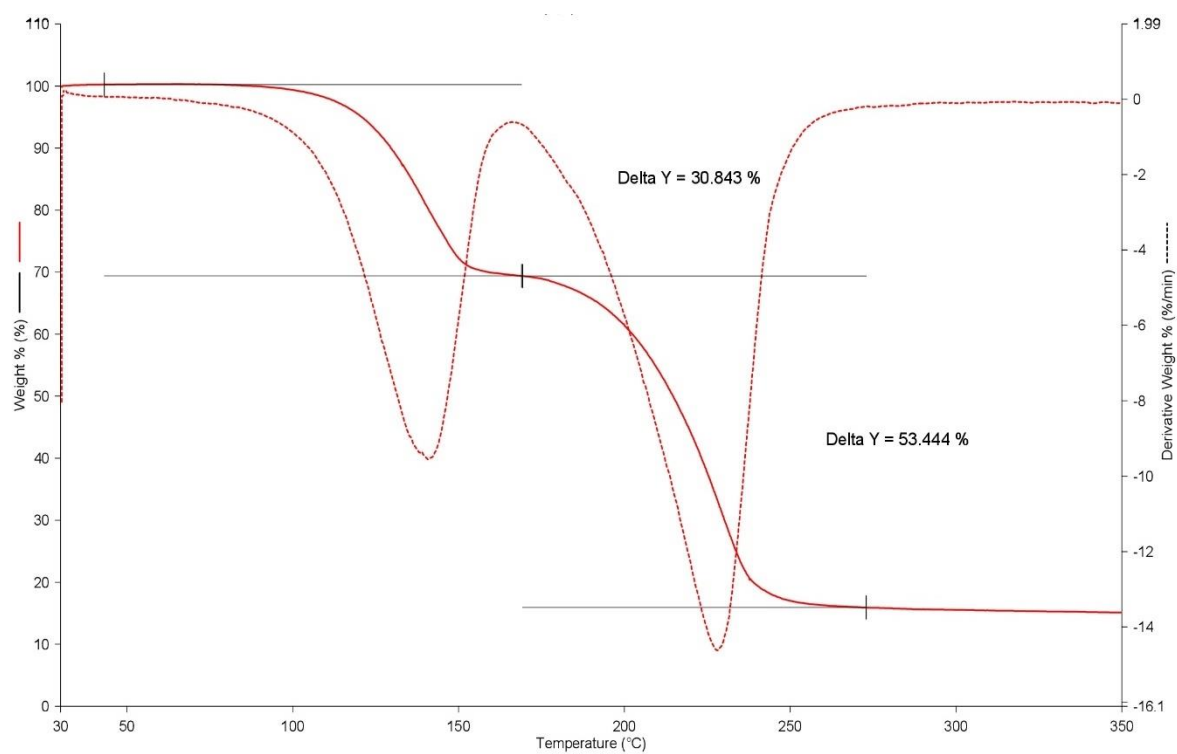

**Figure S12** TG curve of [(R/S)-PSA<sup>-</sup>][ANI<sup>+</sup>]

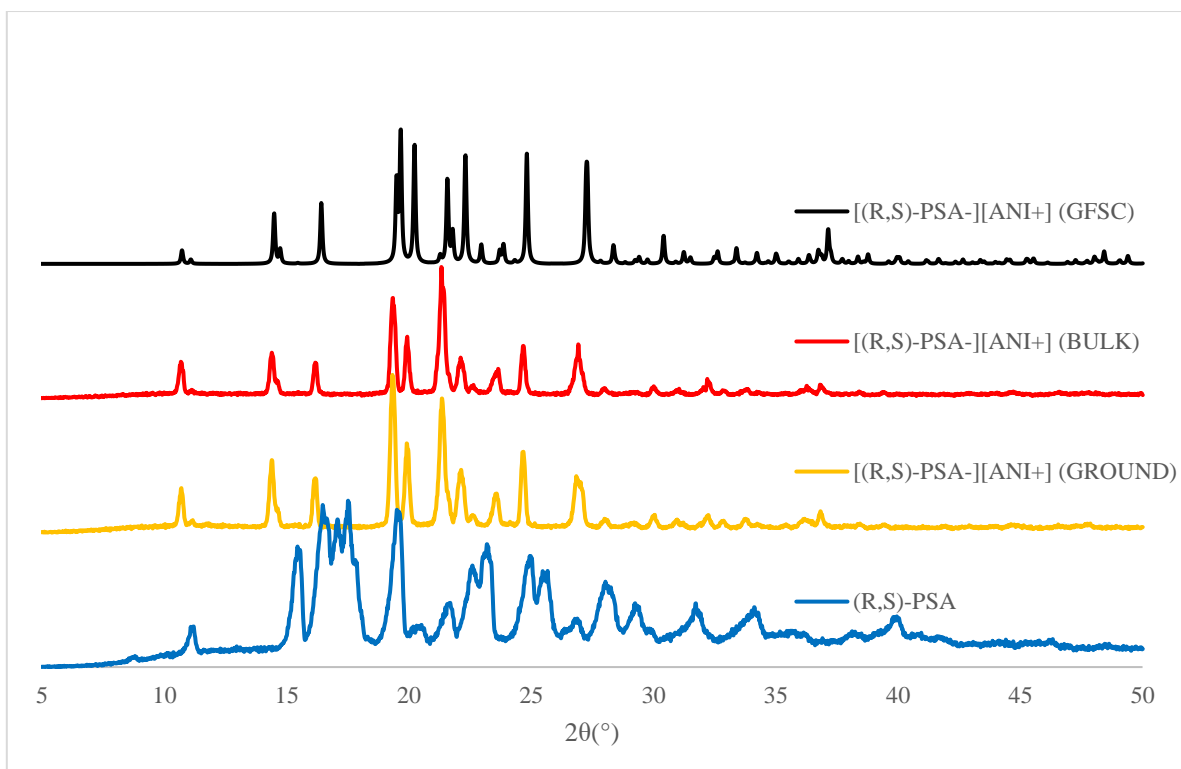

**Figure S13** PXRD curve of  $[(R,S)\text{-PSA}^-][\text{ANI}^+]$  and the starting material

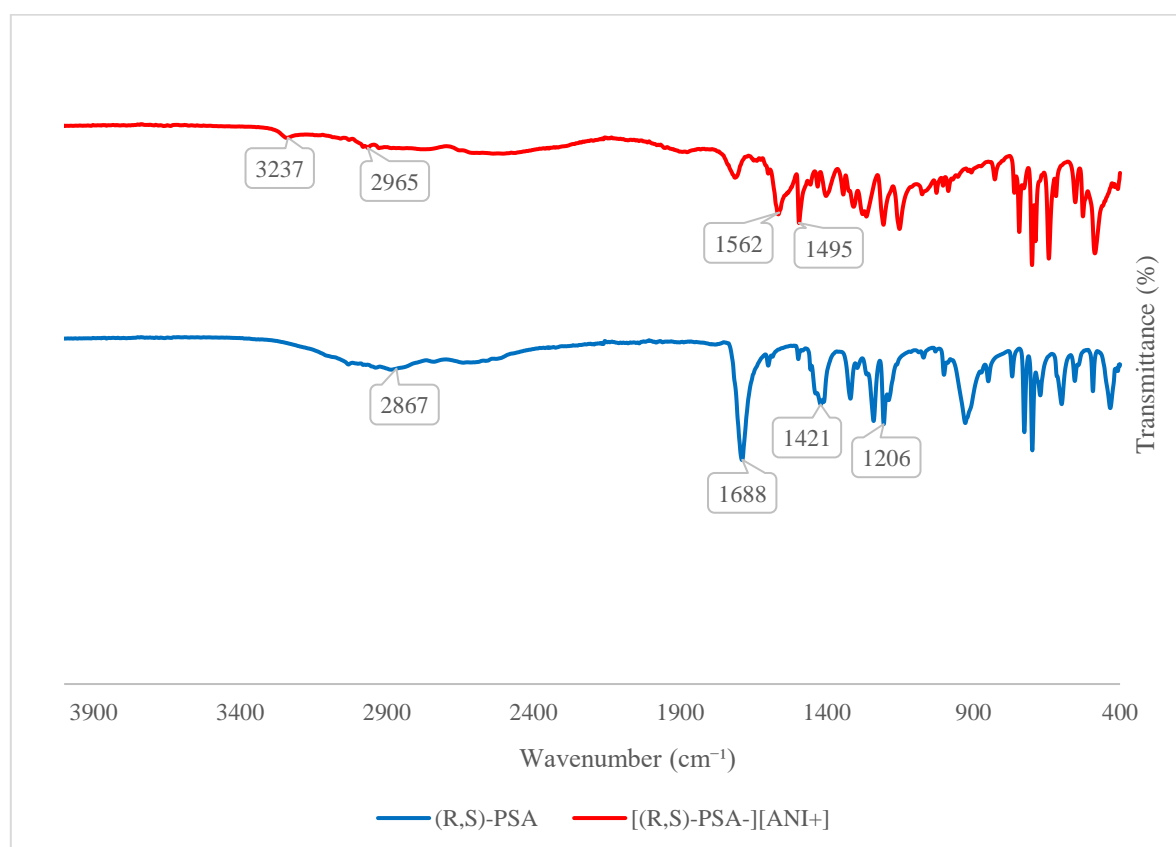

**Figure S14** IR curve of  $[(R,S)\text{-PSA}^-][\text{ANI}^+]$  and the starting material

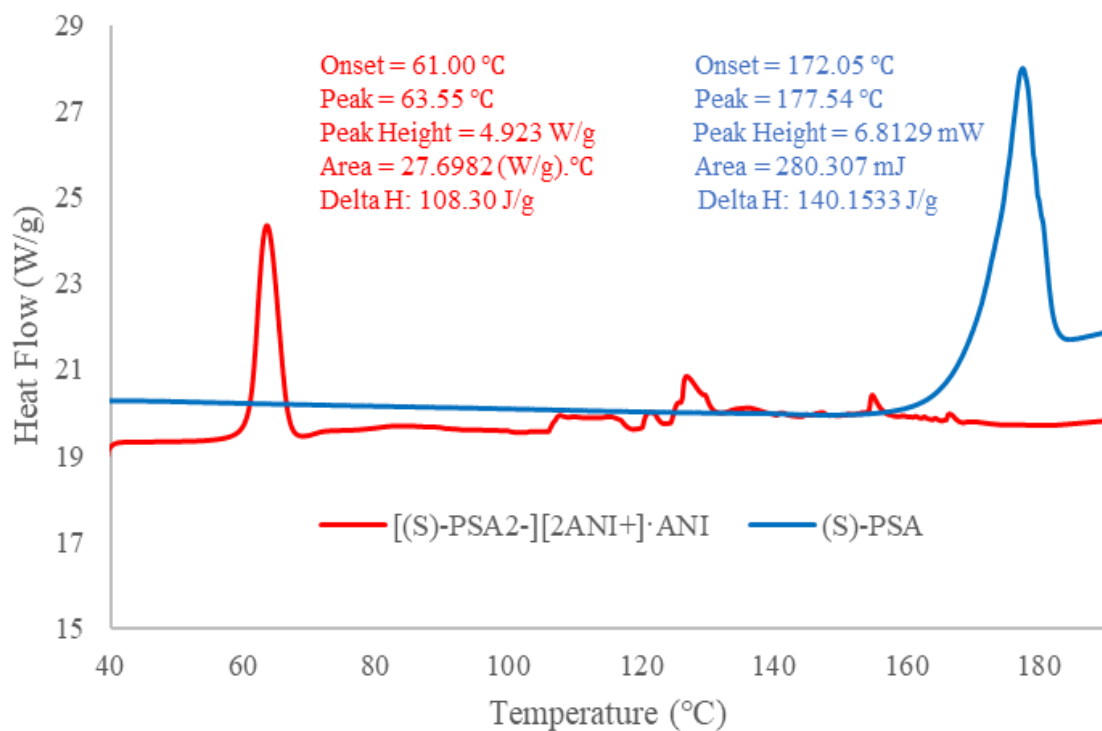

**Figure S15** DSC curve of [(S)-PSA<sup>2-</sup>][2ANI<sup>+</sup>]·ANI and the starting material

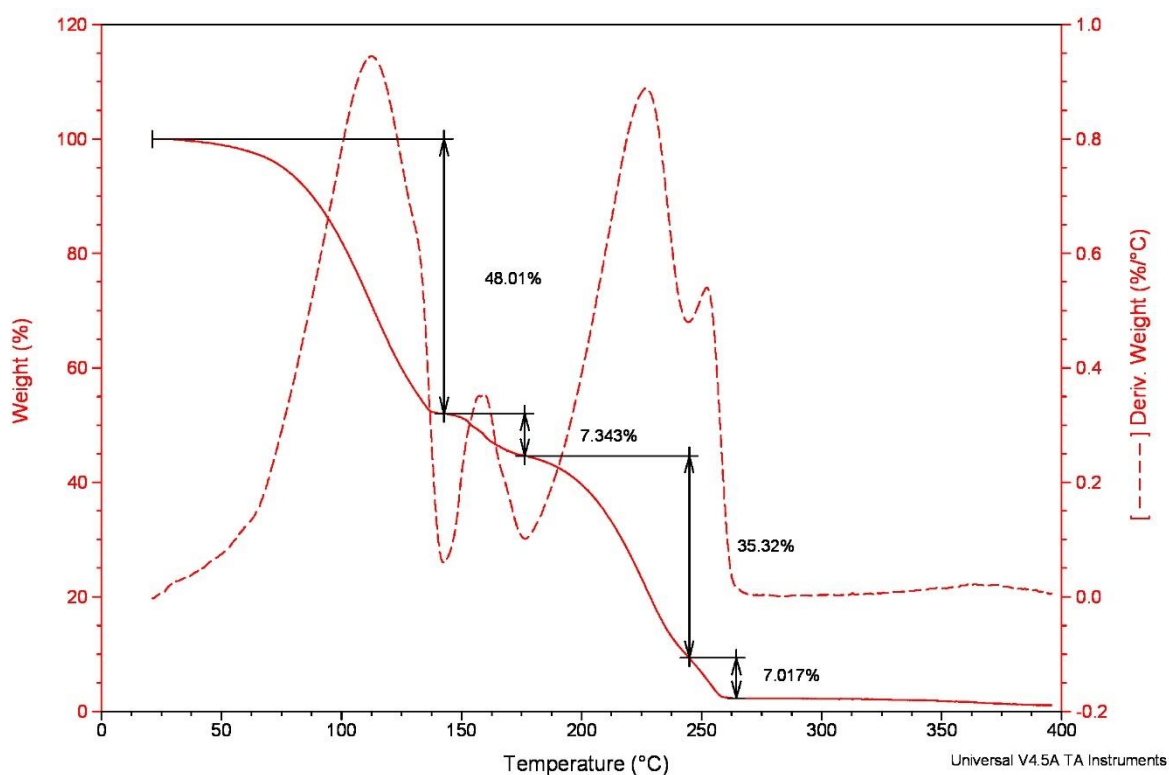

**Figure S16** TG curve of [(S)-PSA<sup>2-</sup>][2ANI<sup>+</sup>]·ANI



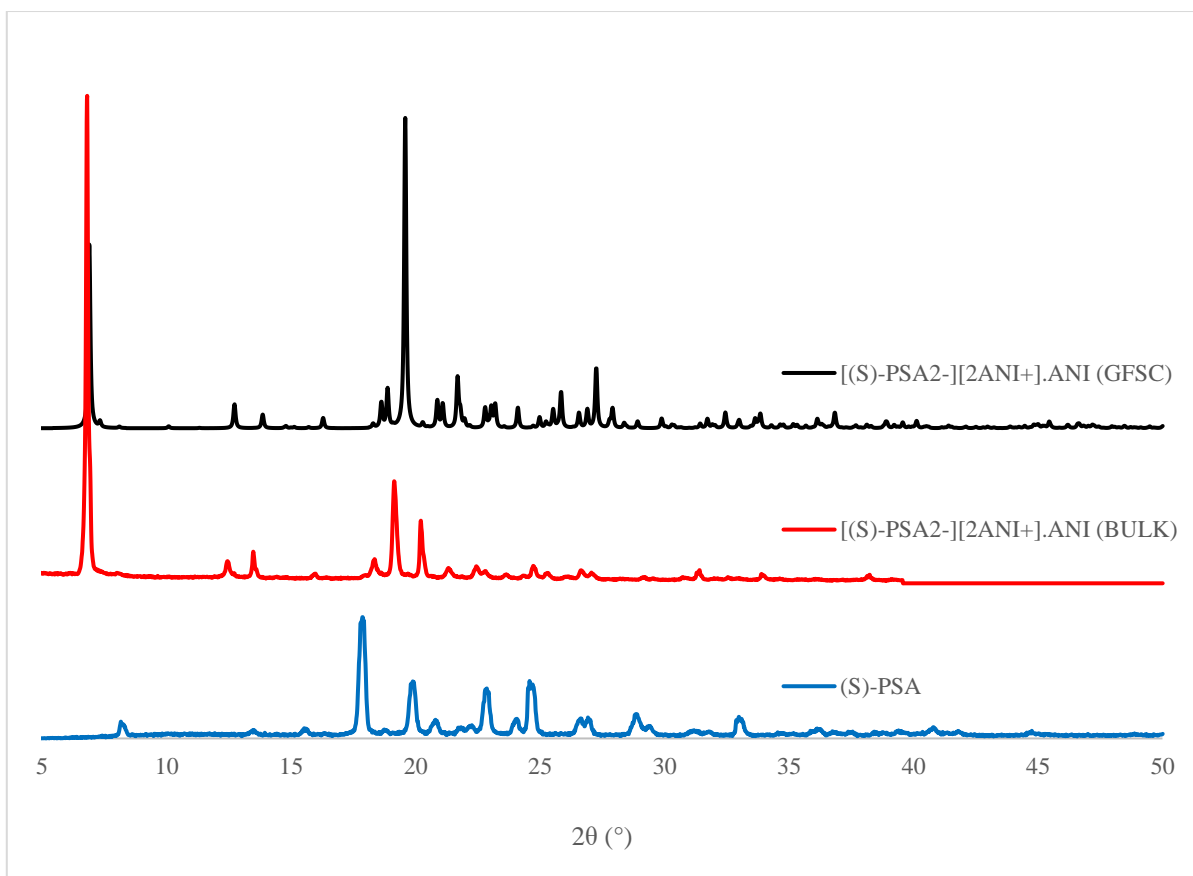

**Figure S17** PXRD curve of  $[(S)\text{-PSA}^{2-}][2\text{ANI}^+]\cdot\text{ANI}$  and the starting material

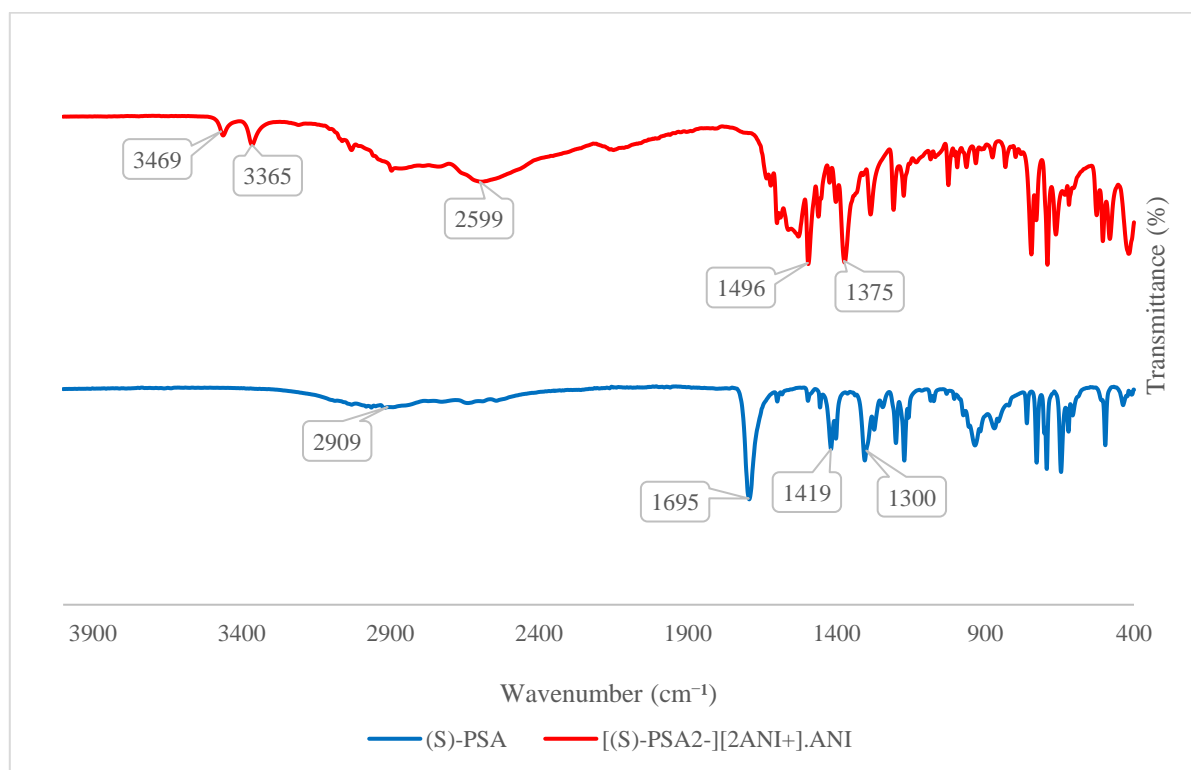

**Figure S18** IR curve of  $[(S)\text{-PSA}^{2-}][2\text{ANI}^+]\cdot\text{ANI}$  and the starting material

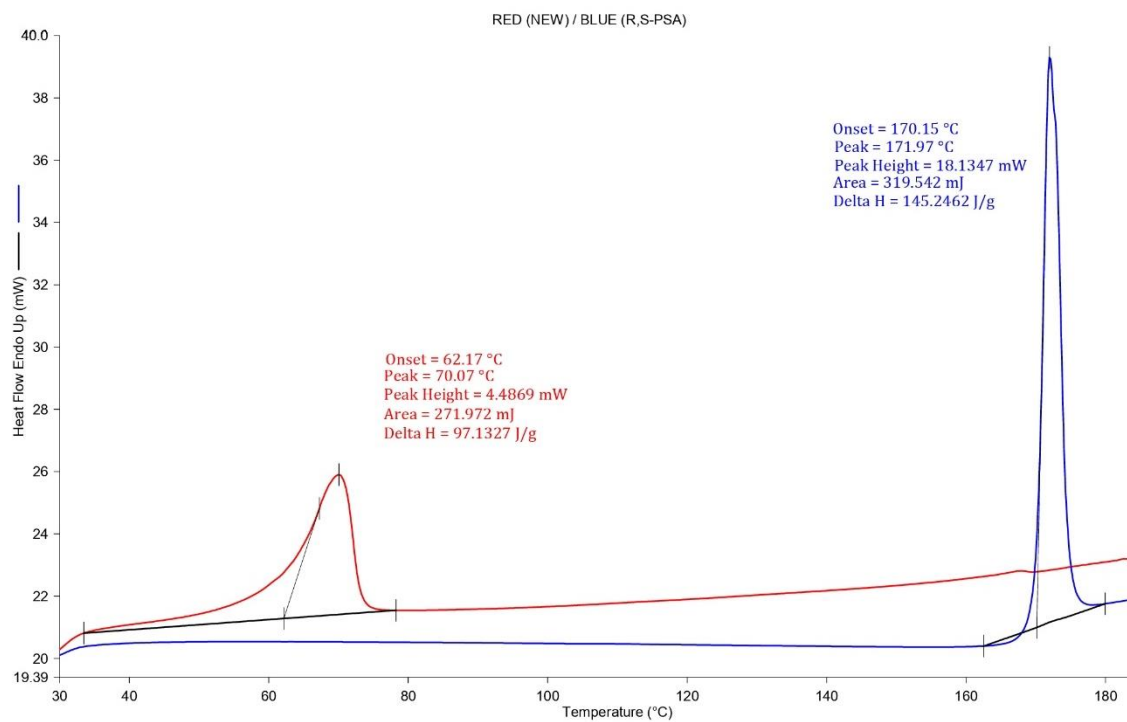

**Figure S19** DSC curve of (R/S)-PSA·2PYR and the starting material

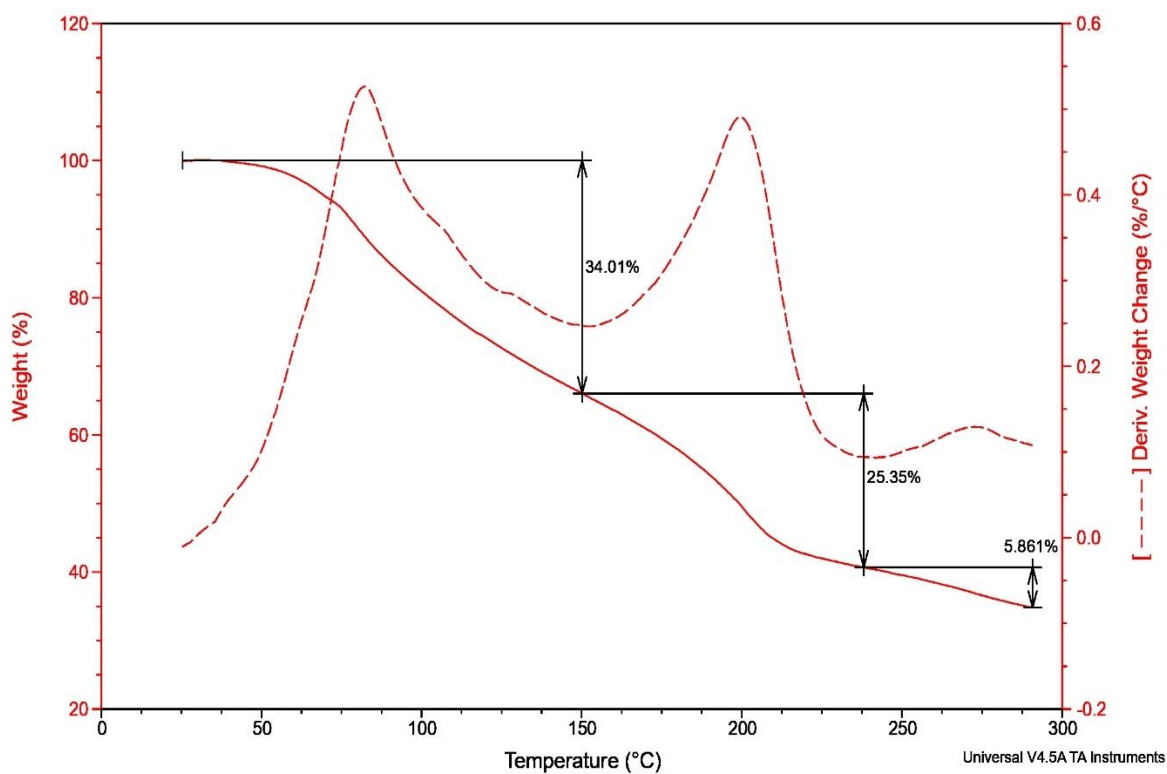

**Figure S20** TG curve of (R/S)-PSA·2PYR

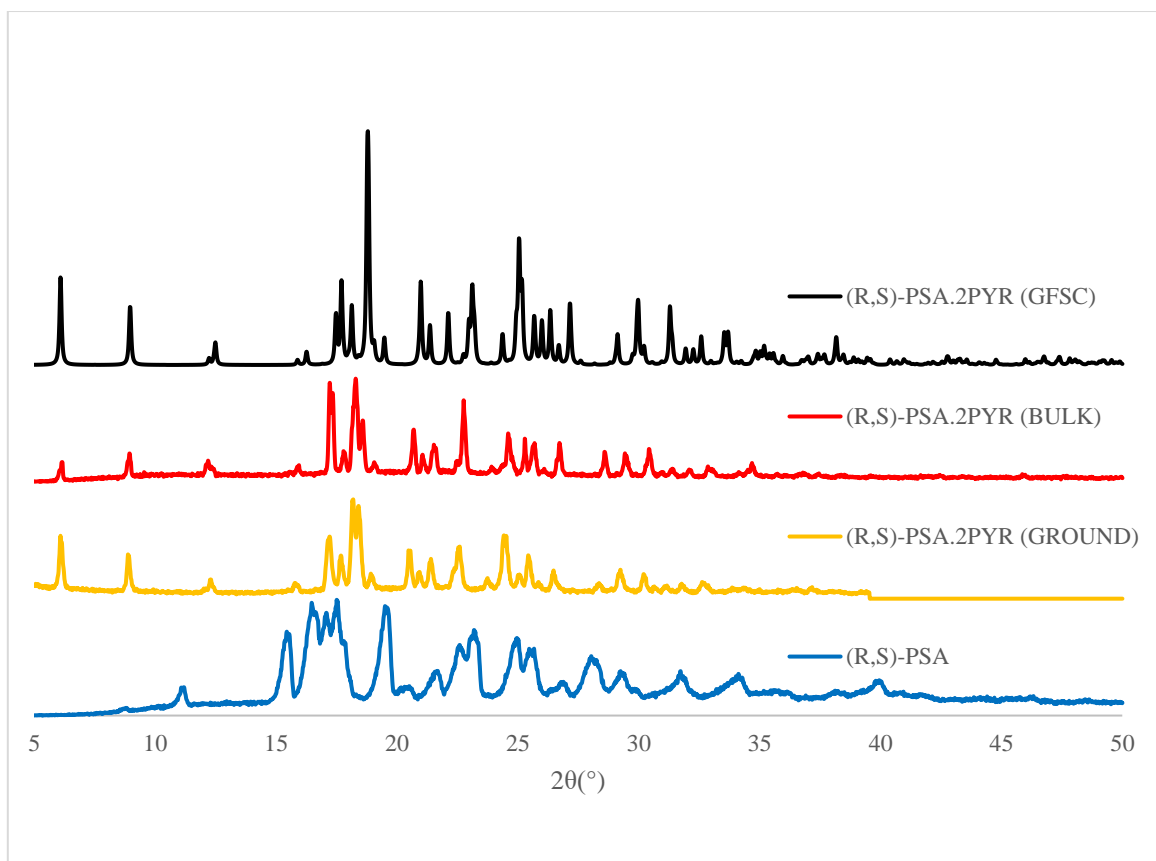

**Figure S21** PXRD curve of (R/S)-PSA·2PYR and the starting material

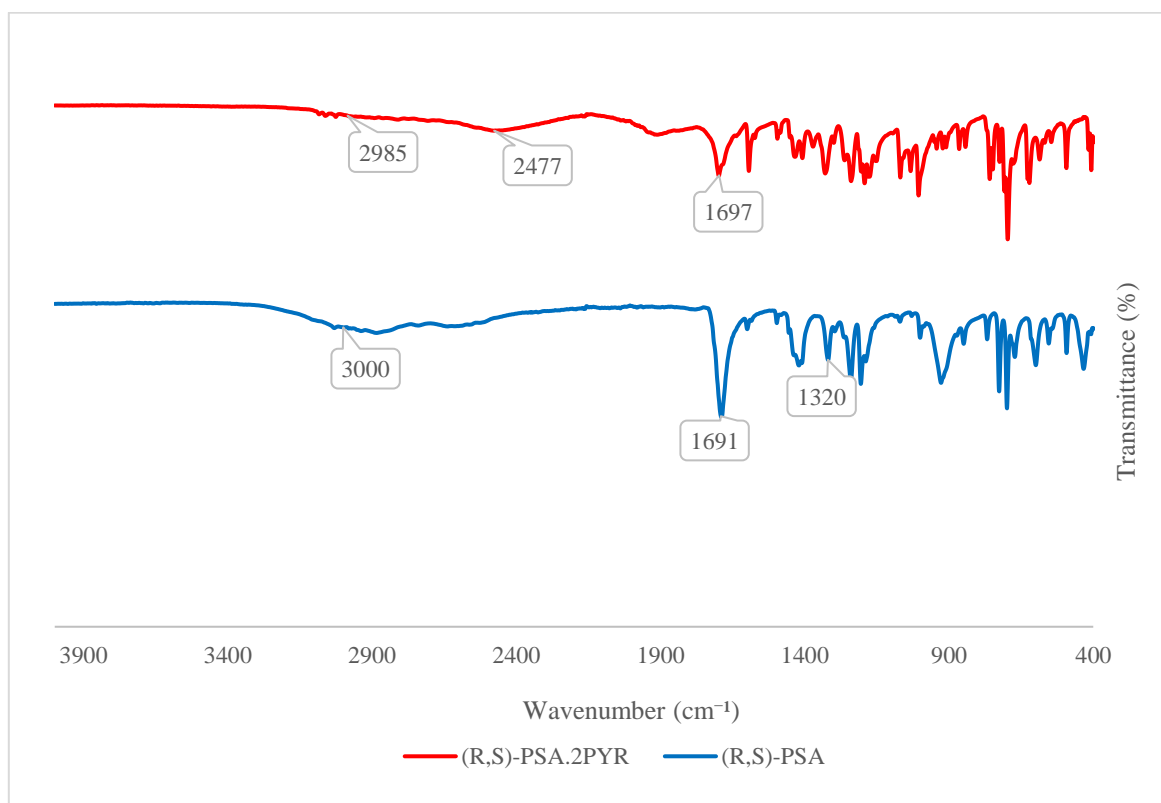

**Figure S22** IR curve of (R/S)-PSA·2PYR and the starting material

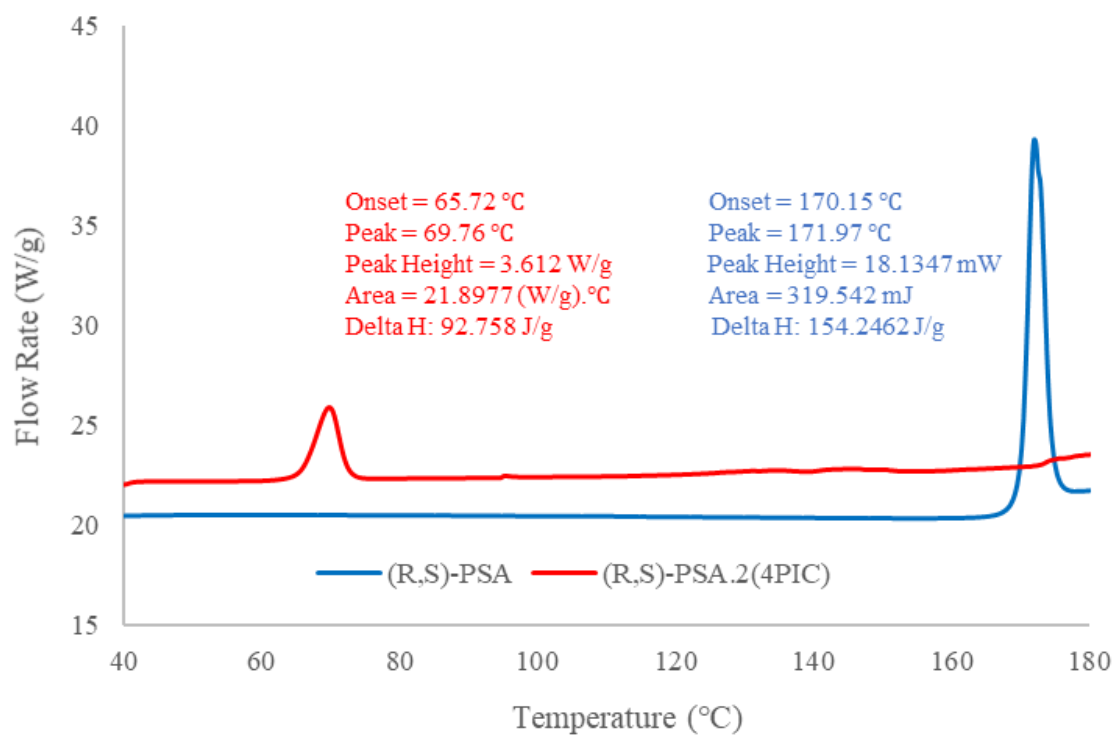

**Figure S23** DSC curve of (R/S)-PSA·2(4PIC) and the starting material

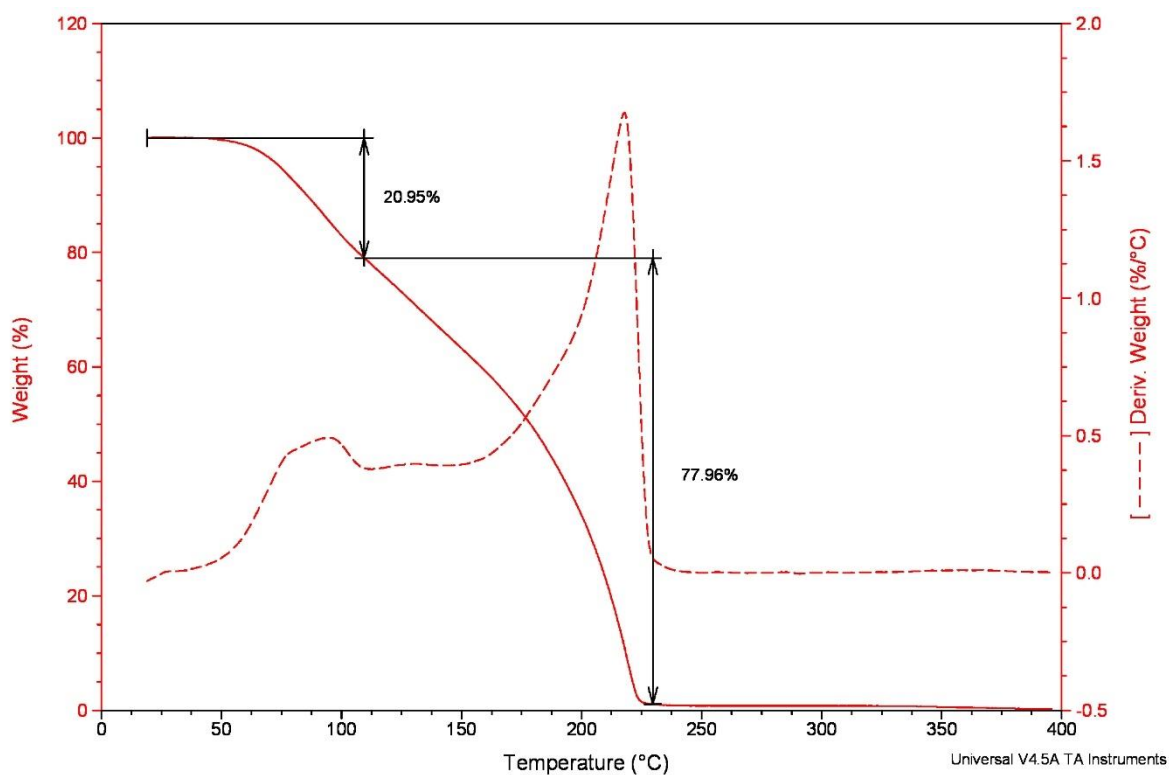

**Figure S24** TG curve of (R/S)-PSA·2(4PIC)

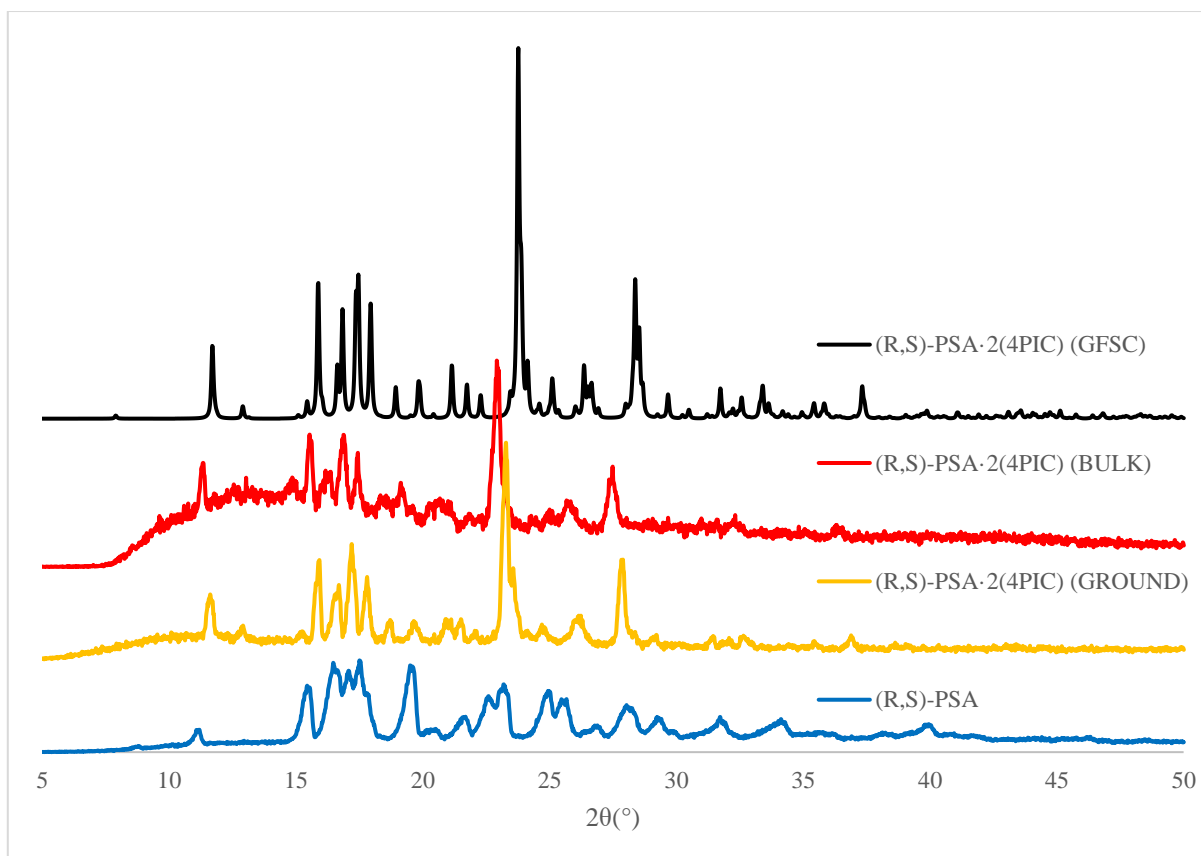

**Figure S25** PXRD curve of (R/S)-PSA·2(4PIC) and the starting material

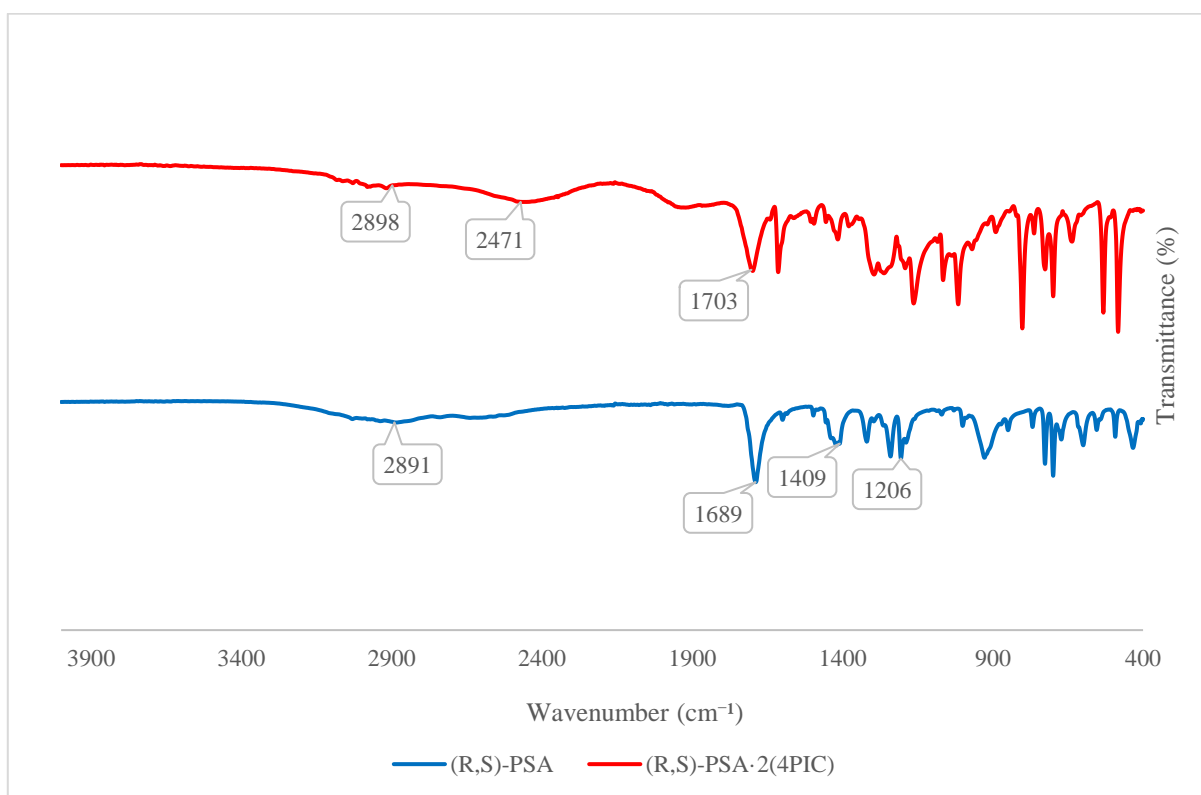

**Figure S26** IR curve of (R/S)-PSA·2(4PIC) and the starting material

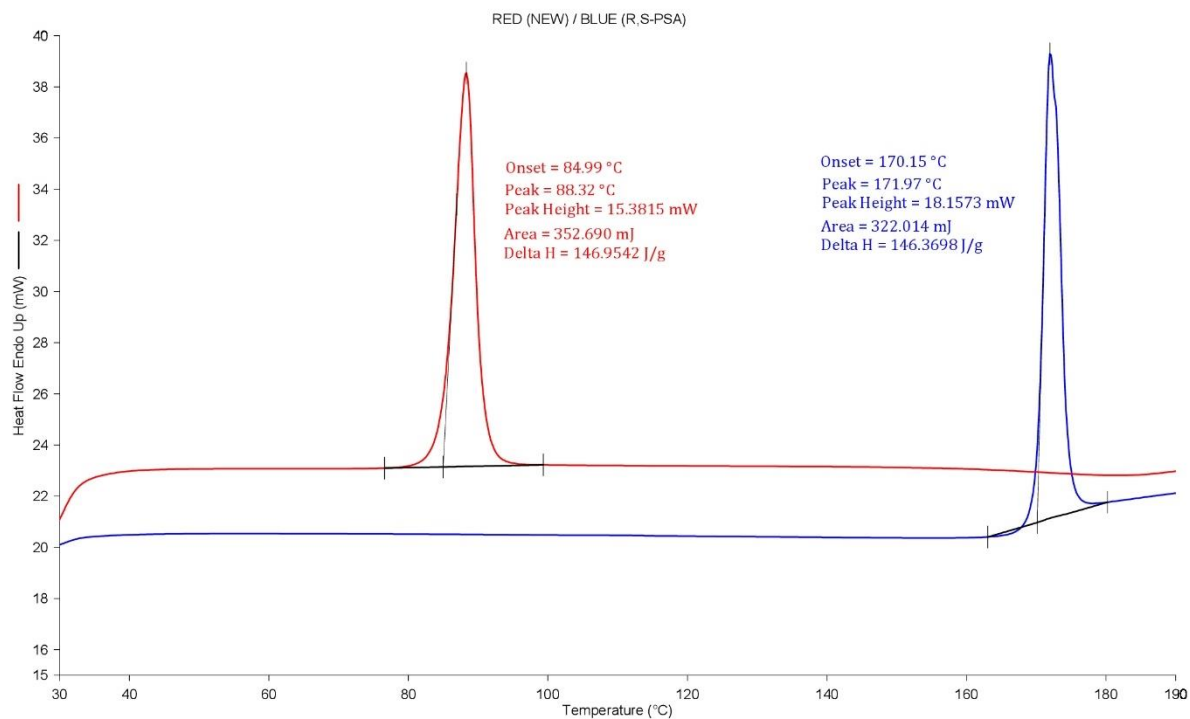

**Figure S27** DSC curve of (R/S)-PSA·2(3,4LUT) and the starting material

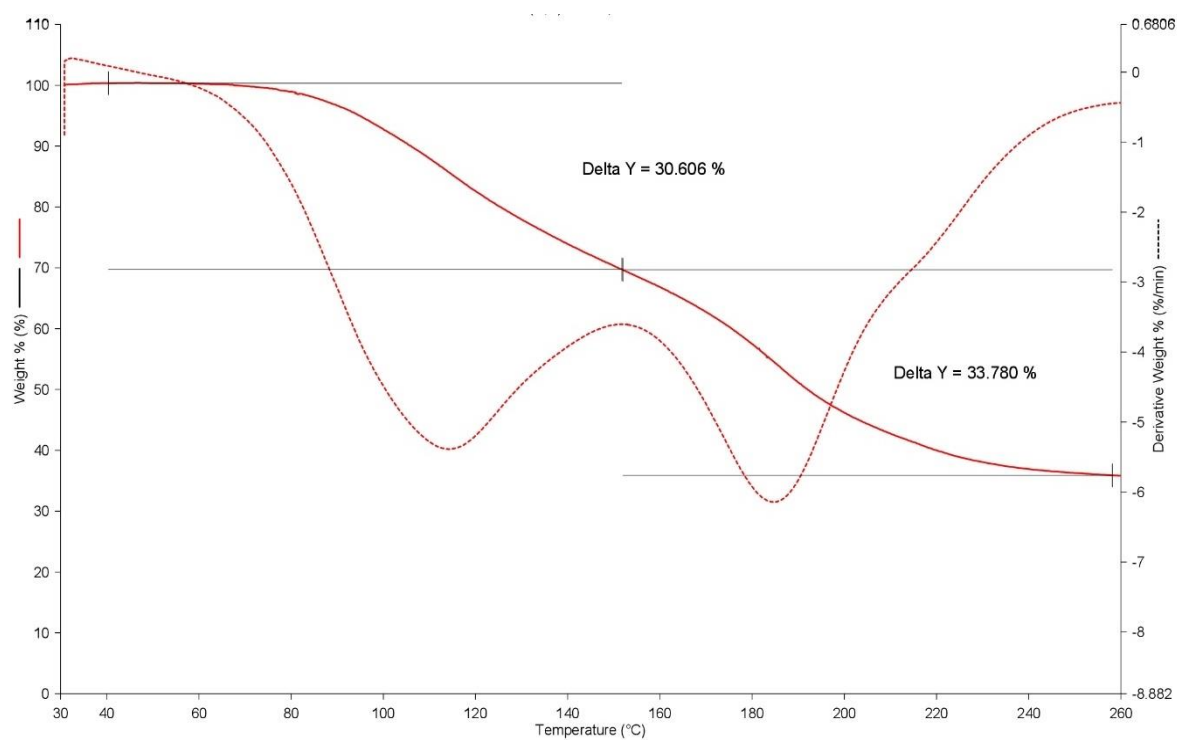

**Figure S28** TG curve of (R/S)-PSA·2(3,4LUT)

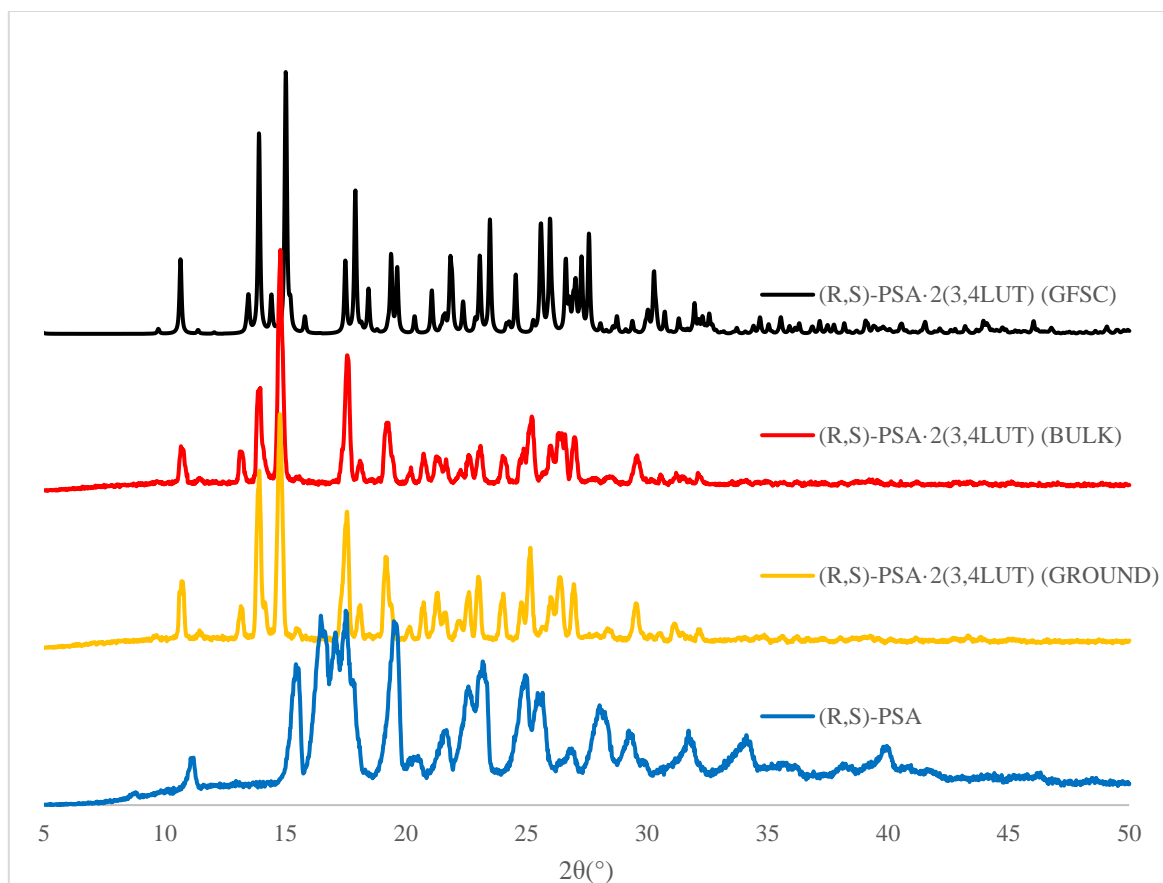

**Figure S29** PXRD curve of (R/S)-PSA·2(3,4LUT) and the starting material

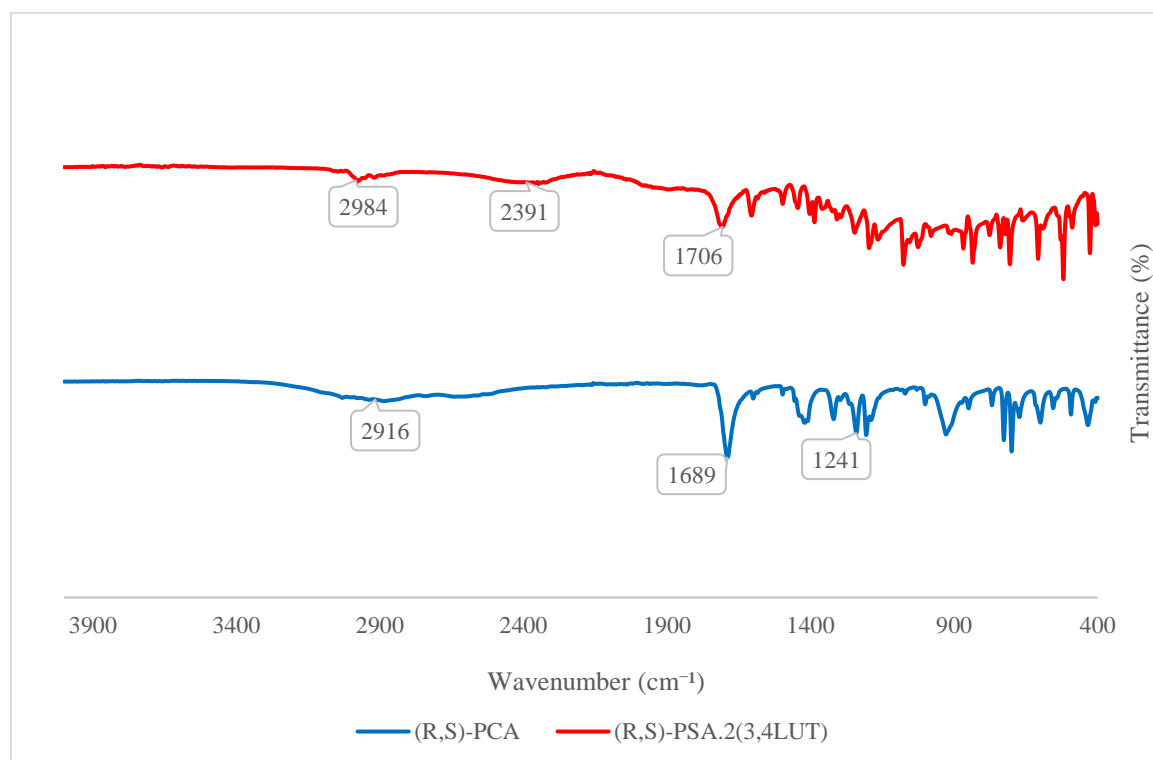

**Figure S30** IR curve of (R/S)-PSA·2(3,4LUT) and the starting material

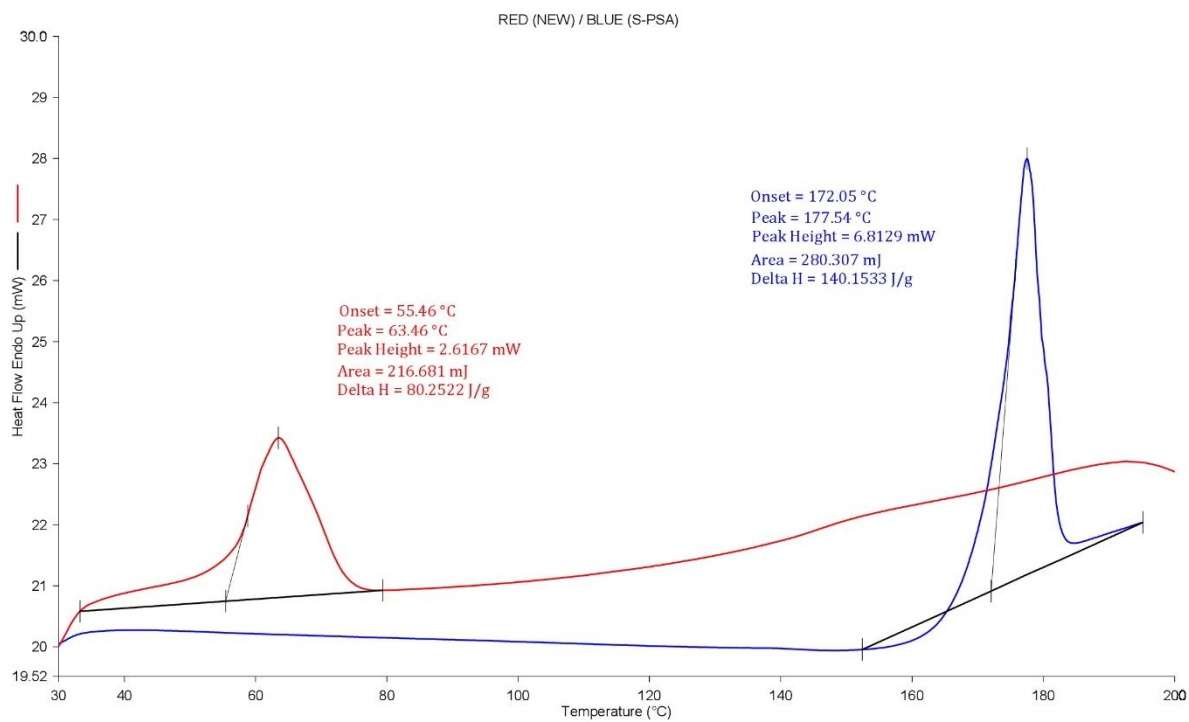

**Figure S31** DSC curve of 2(S)-PSA·4(3,4LUT) and the starting material

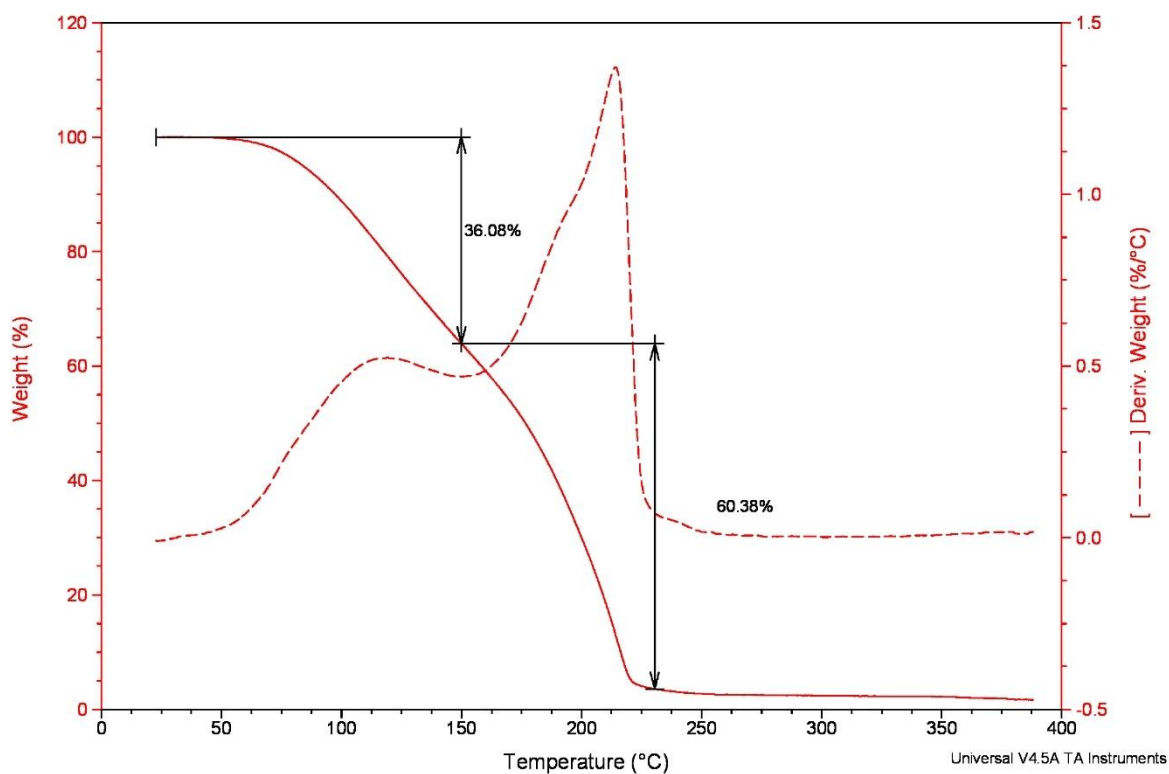

**Figure S32** TG curve of 2(S)-PSA·4(3,4LUT)



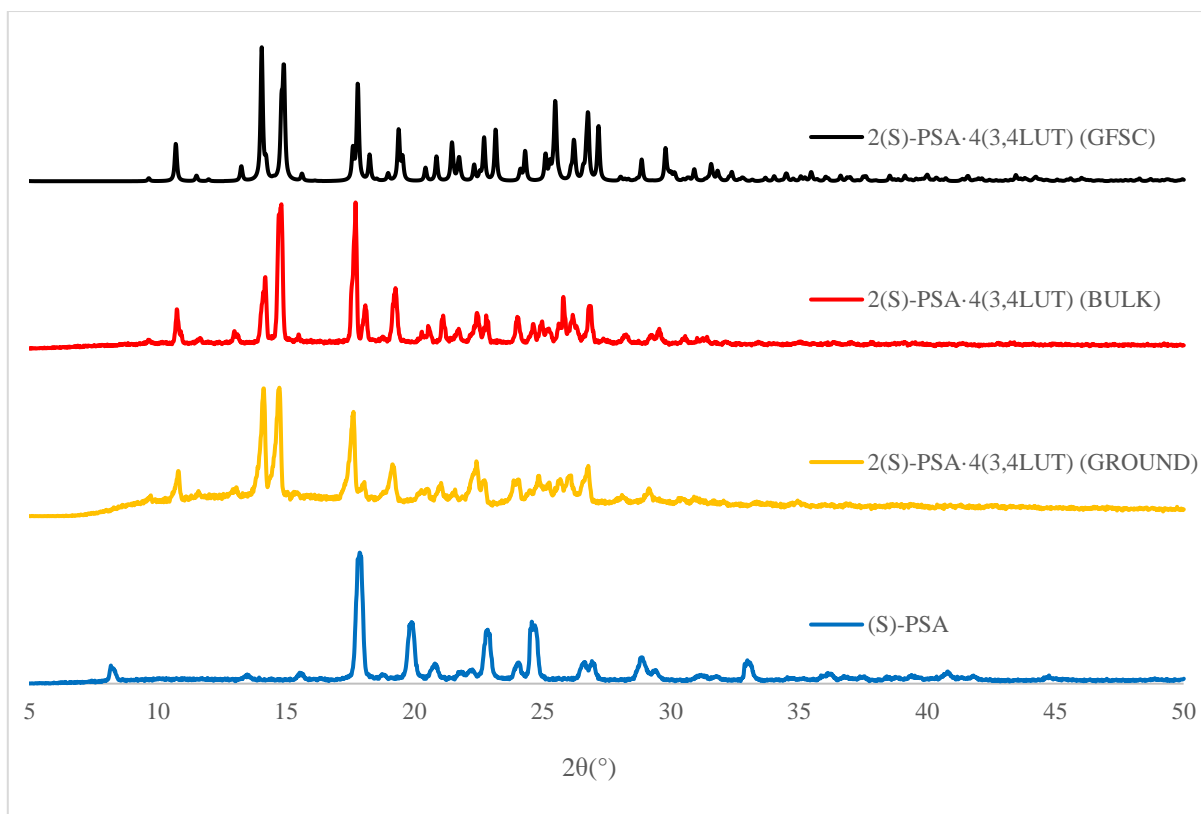

**Figure S33** PXRD curve of 2(S)-PSA·4(3,4LUT) and the starting material

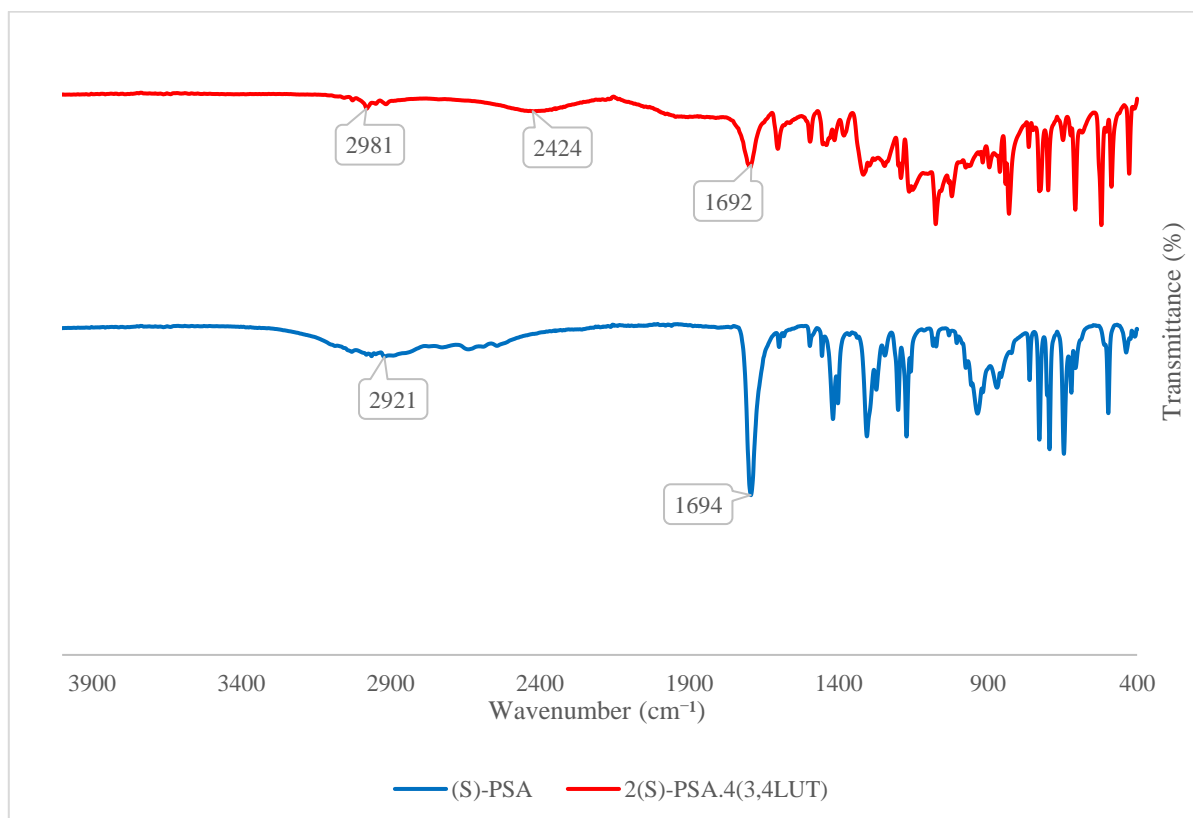

**Figure S34** IR curve of 2(S)-PSA·4(3,4LUT) and the starting material

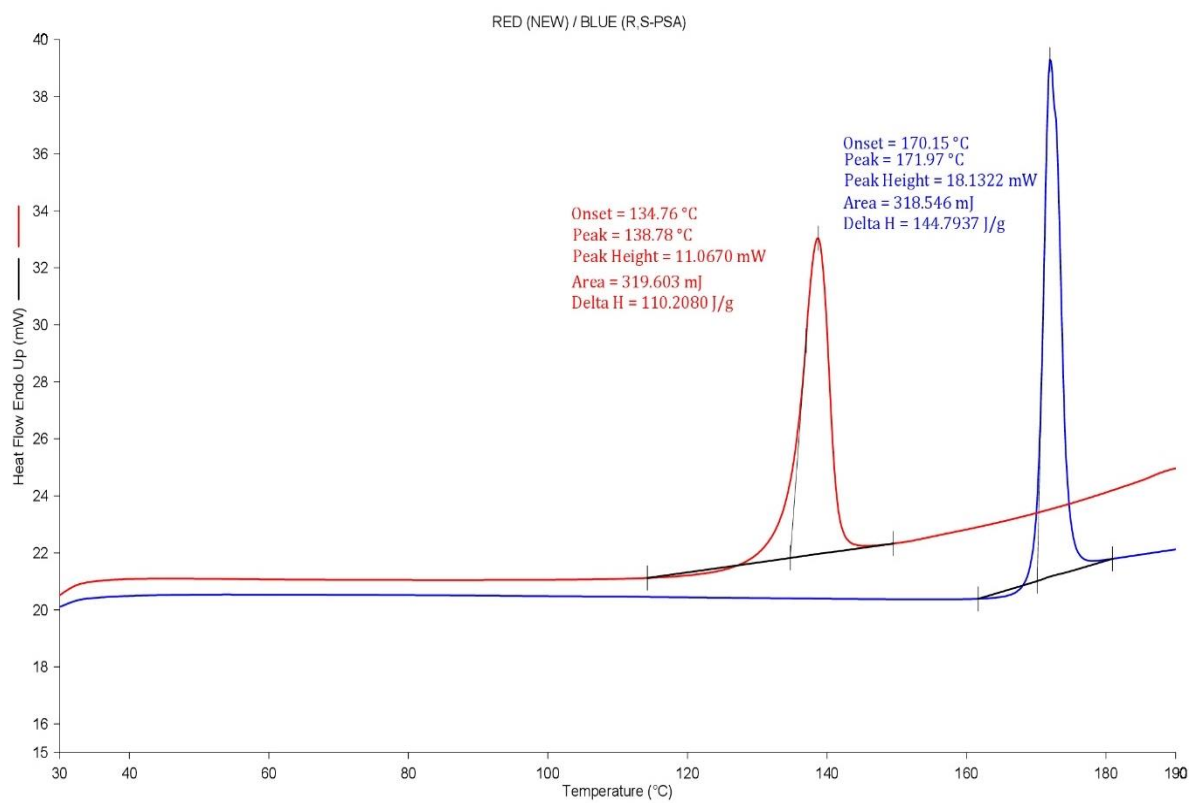

**Figure S35** DSC curve of  $[(R/S)\text{-PSA}^{2-}] \cdot 2[3,5\text{LUT}^+] \cdot 2(R/S)\text{-PSA}$  and the starting material

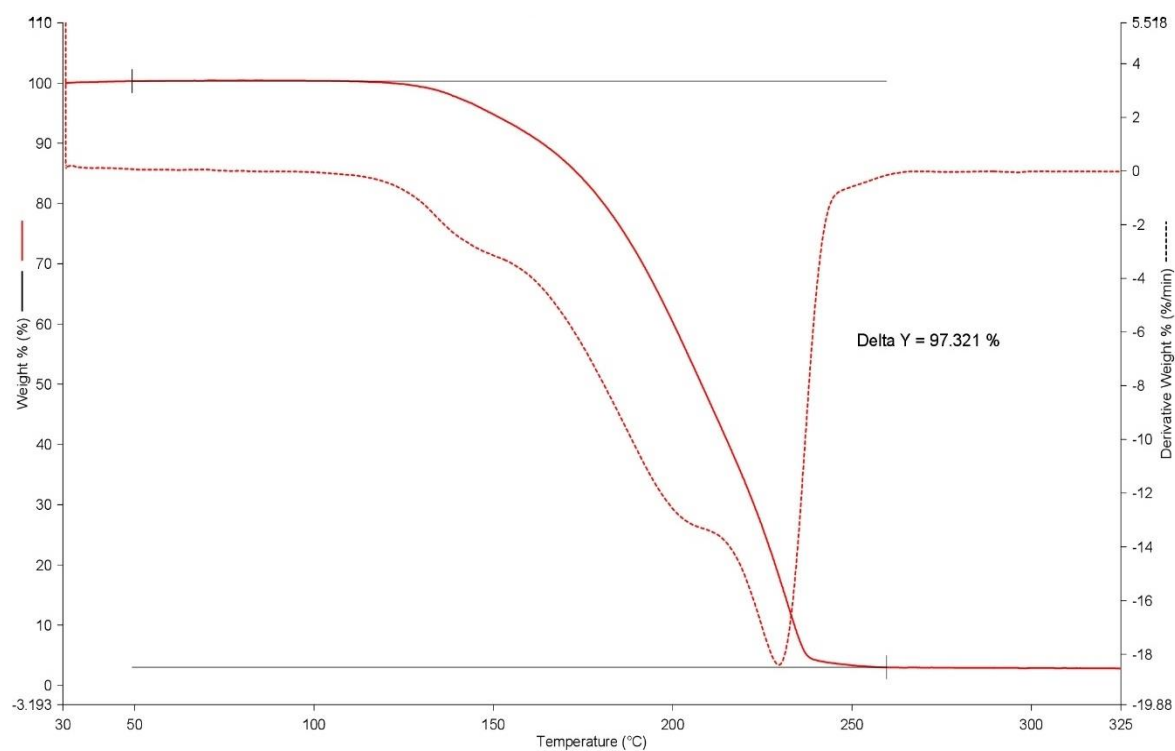

**Figure S36** TG curve of  $[(R/S)\text{-PSA}^{2-}] \cdot 2[3,5\text{LUT}^+] \cdot 2(R/S)\text{-PSA}$

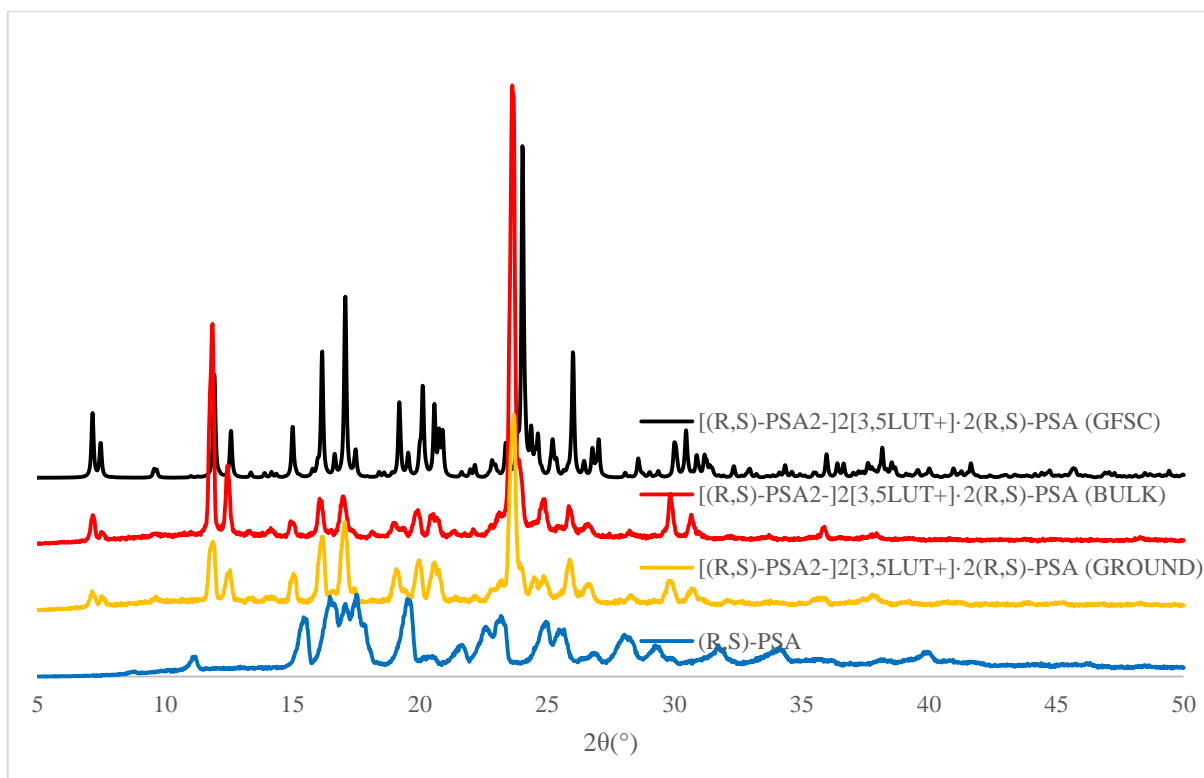

**Figure S37** PXRD curve of  $[(R,S)\text{-PSA}_2\text{-}]_2[3,5\text{LUT}^+] \cdot 2(R,S)\text{-PSA}$  and the starting material

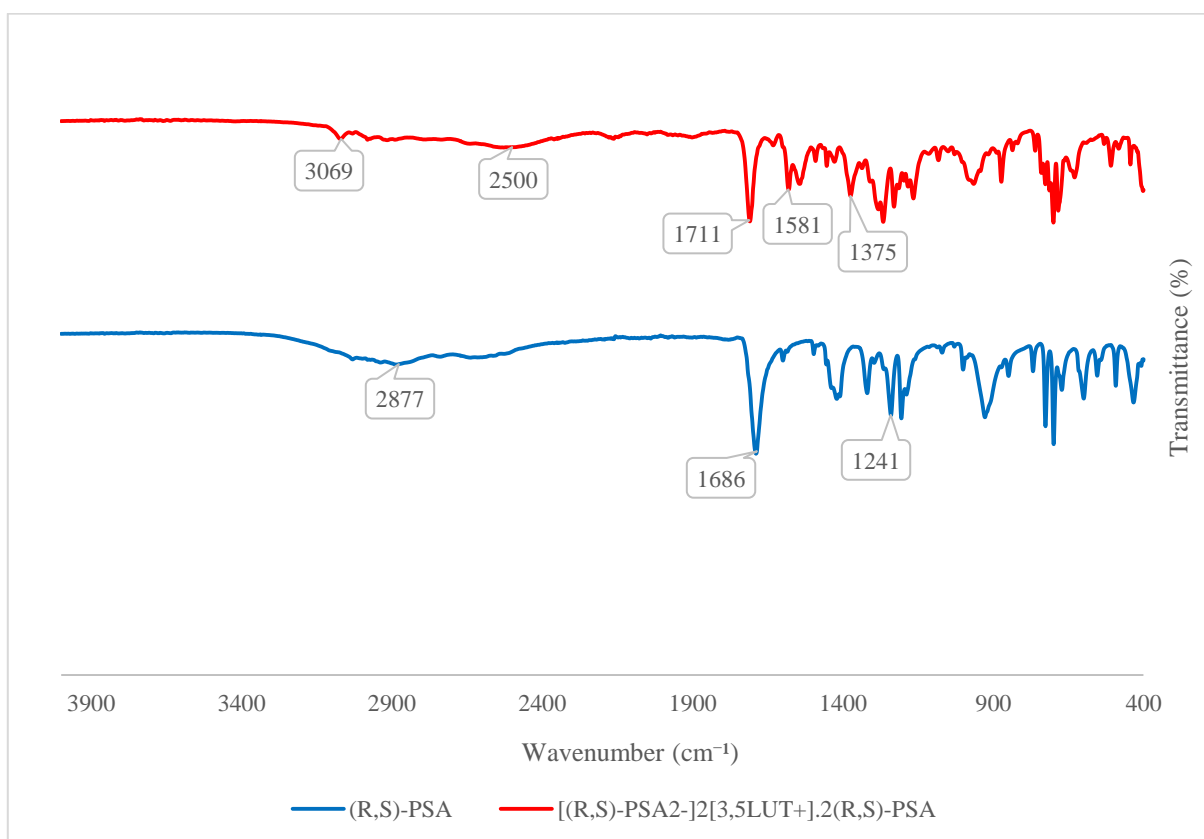

**Figure S38** IR curve of  $[(R,S)\text{-PSA}_2\text{-}]_2[3,5\text{LUT}^+] \cdot 2(R,S)\text{-PSA}$  and the starting material

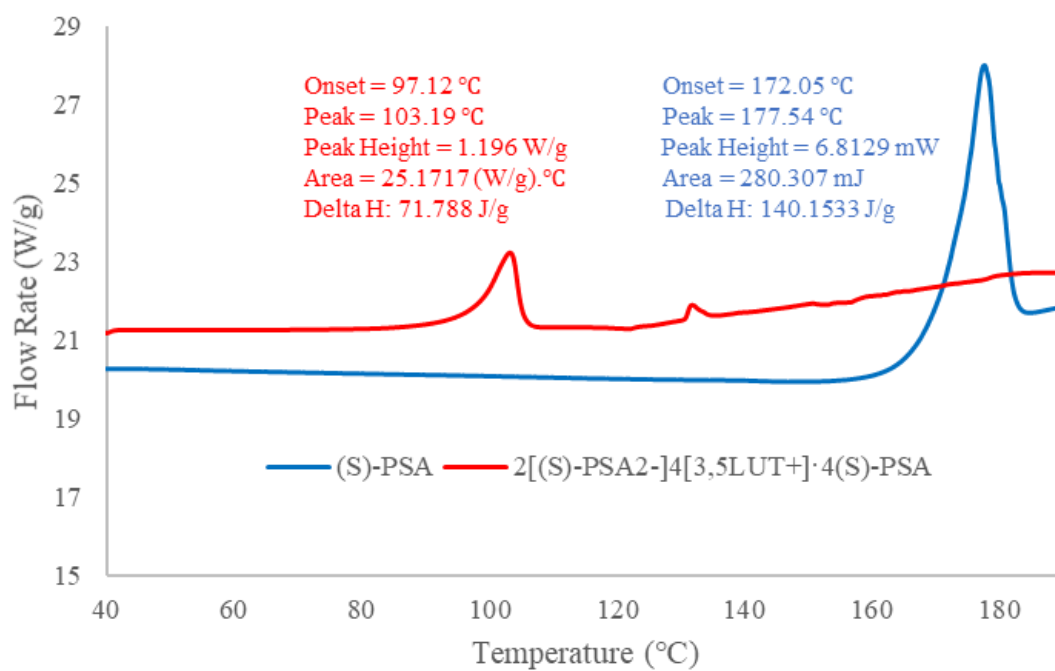

**Figure S39** DSC curve of 2[(S)-PSA<sup>2-</sup>]<sub>4</sub>[3,5LUT<sup>+</sup>]<sub>4</sub>(S)-PSA and the starting material

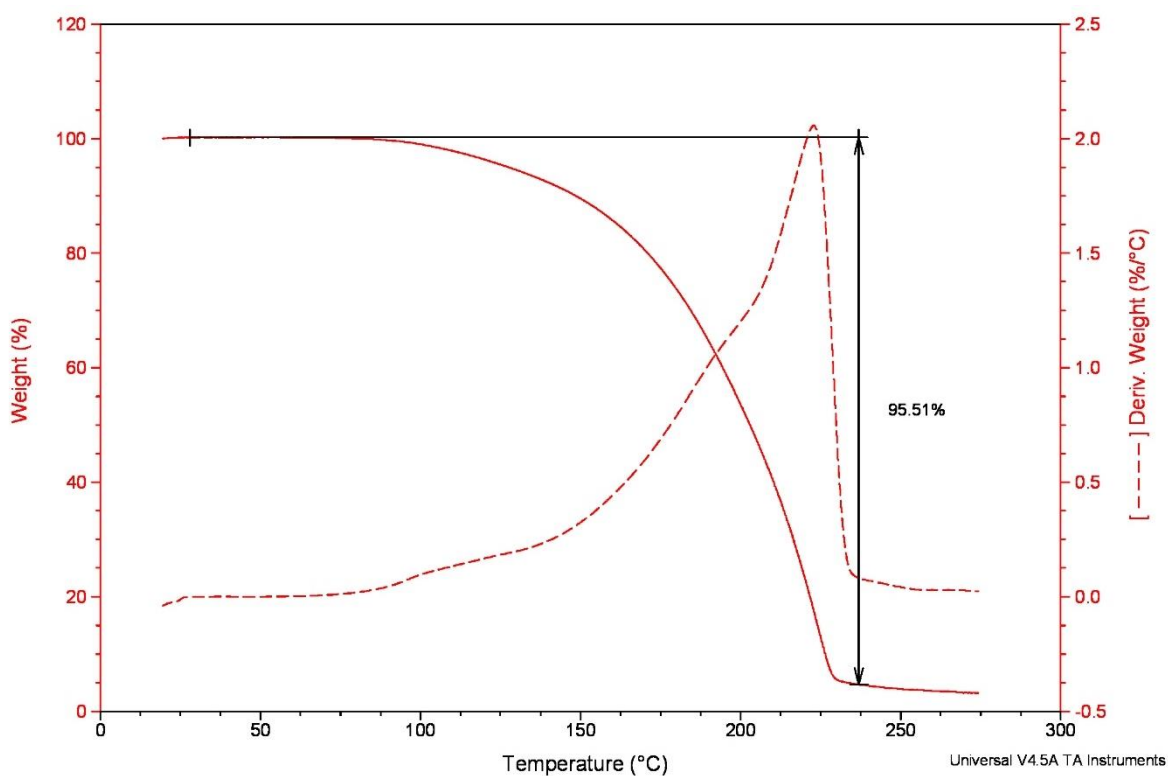

**Figure S40** TG curve of 2[(S)-PSA<sup>2-</sup>]<sub>4</sub>[3,5LUT<sup>+</sup>]<sub>4</sub>(S)-PSA

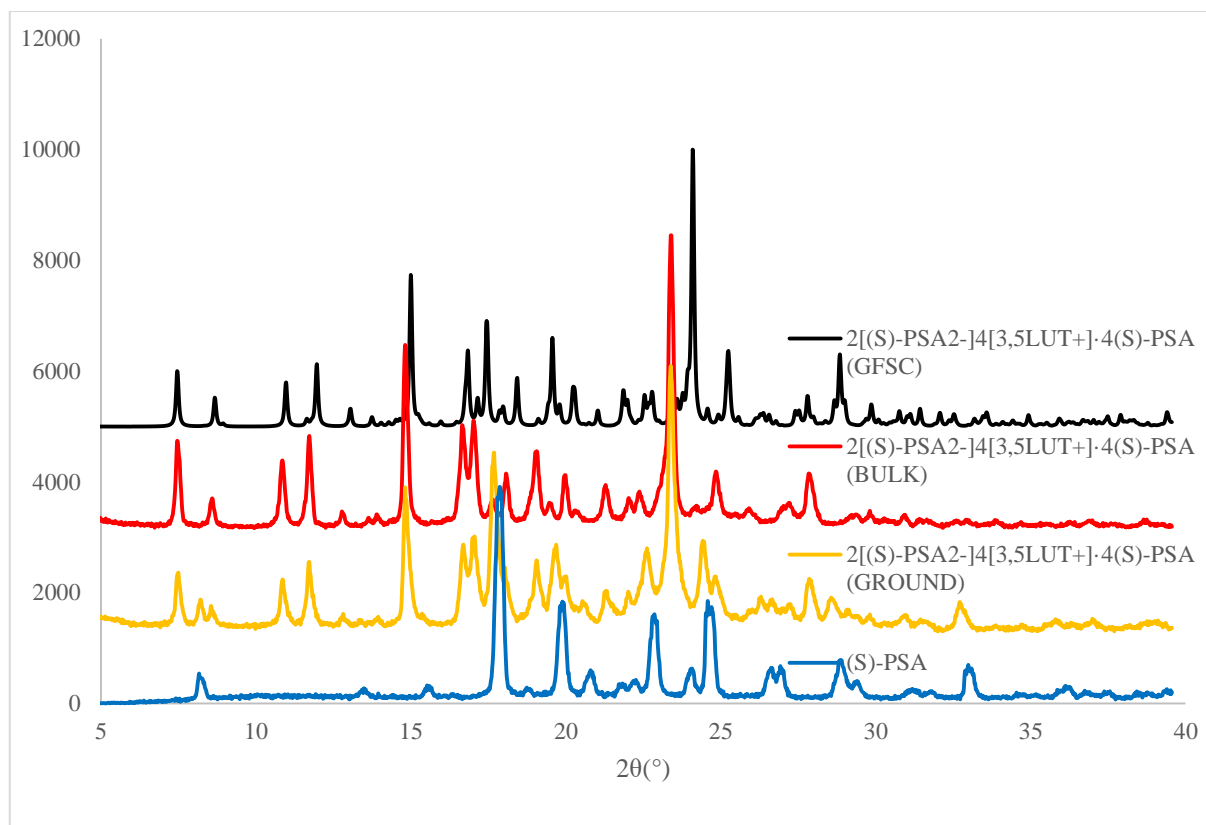

**Figure S41** PXRD curve of  $2[(S)\text{-PSA}^{2-}]_4[3,5\text{LUT}^+] \cdot 4(S)\text{-PSA}$  and the starting material

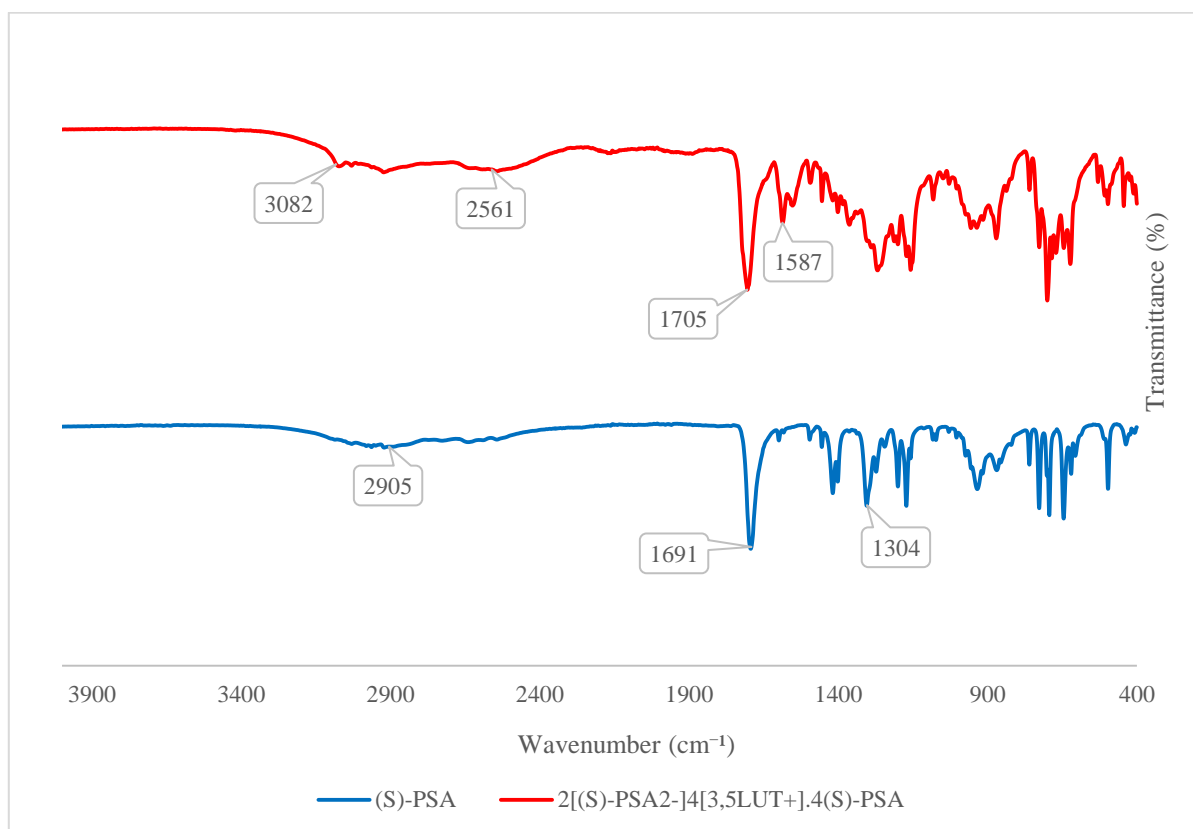

**Figure S42** IR curve of  $2[(S)\text{-PSA}^{2-}]_4[3,5\text{LUT}^+] \cdot 4(S)\text{-PSA}$  and the starting material

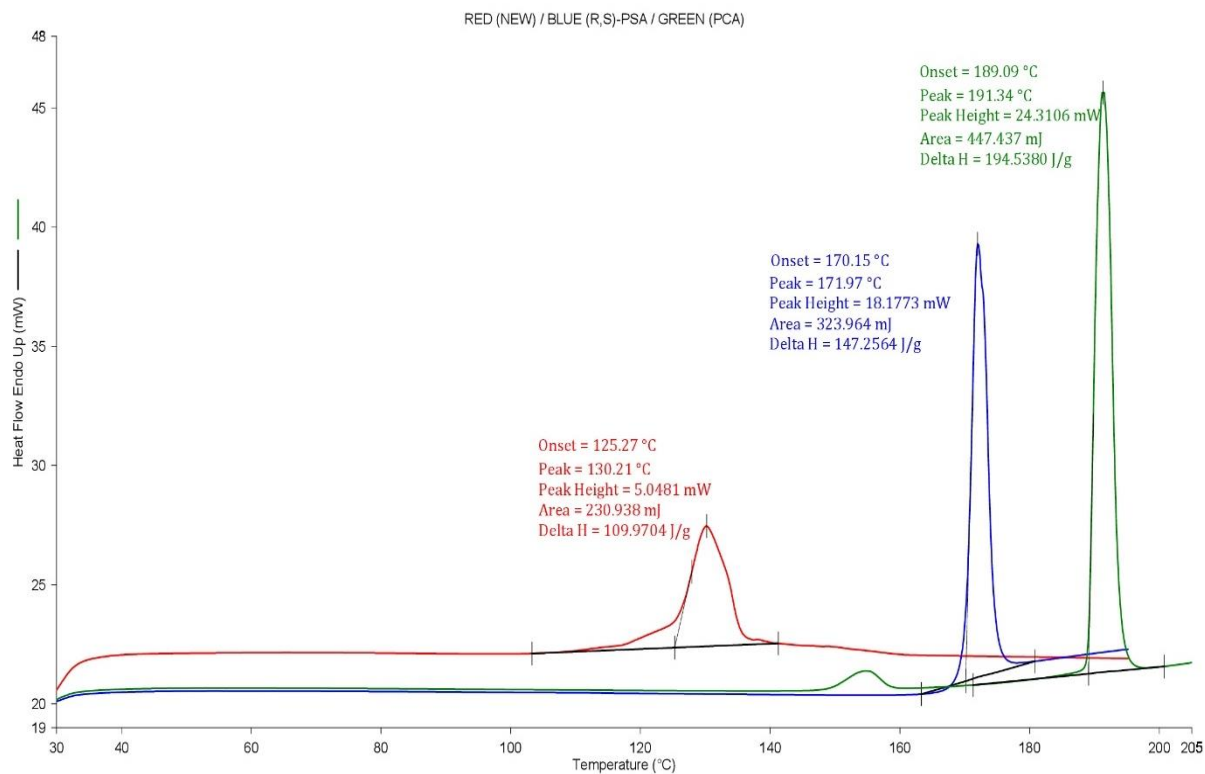

**Figure S43** DSC curve of (R/S)-PSA·PCA and the starting materials

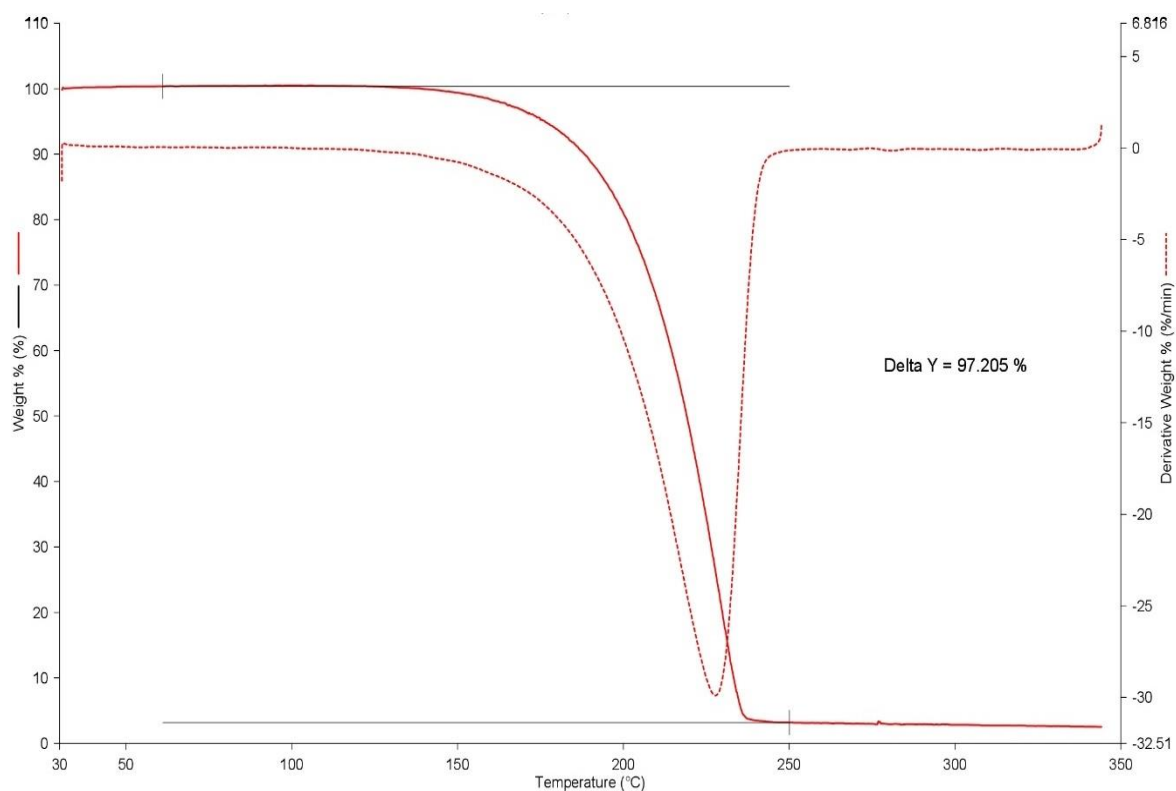

**Figure S44** TG curve of (R/S)-PSA·PCA

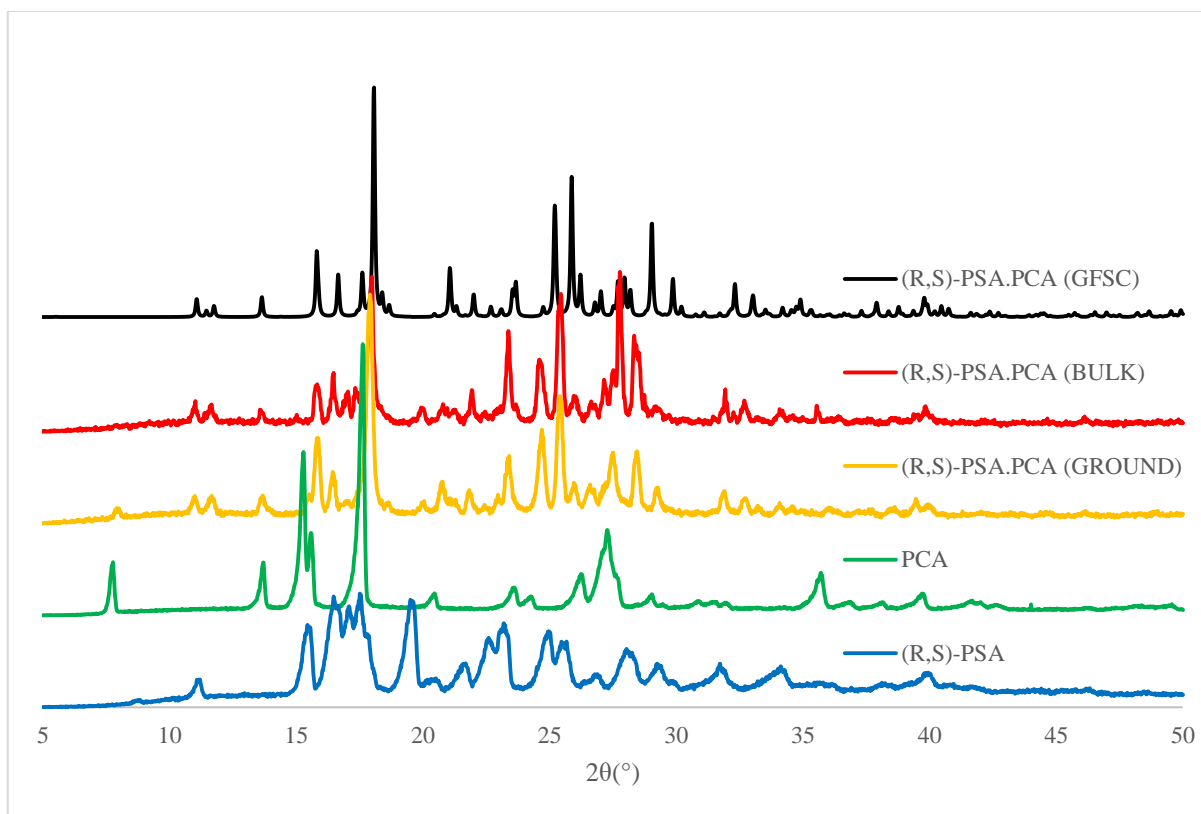

**Figure S45** PXRD curve of (R/S)-PSA·PCA and the starting materials

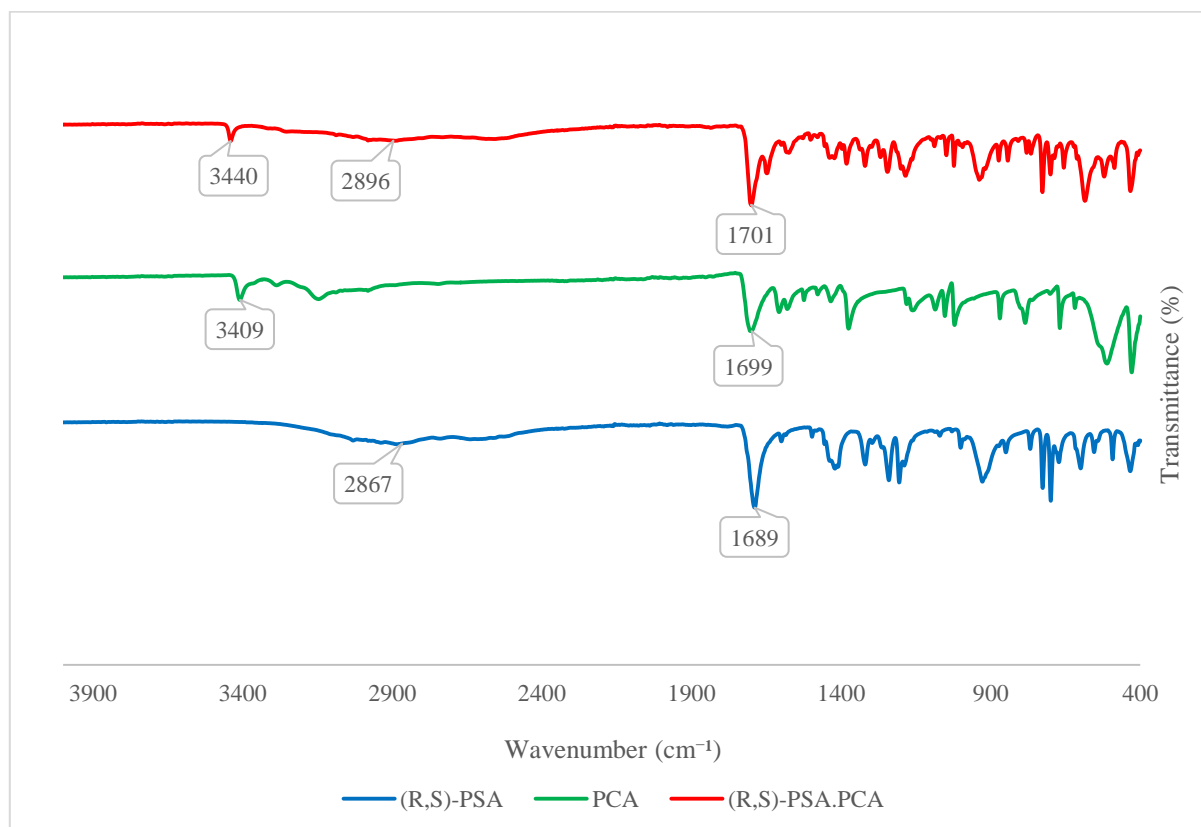

**Figure S46** IR curve of (R/S)-PSA·PCA and the starting materials
